1 **Human Rab GTPase- and class V myosin-dependent membrane tethering in**  
2 **a chemically defined reconstitution system**

3

4 **Motoki Inoshita<sup>1</sup>, Joji Mima<sup>1\*</sup>**

5 <sup>1</sup>Institute for Protein Research, Osaka University, Suita, Osaka, Japan

6

7 **\*For correspondence:**

8 Joji Mima

9 Institute for Protein Research, Osaka University, 3-2 Yamadaoka, Suita, Osaka 565-0871, Japan

10 Tel.: +81 6 6879 4326

11 Fax: +81 6 6879 4329

12 E-mail: Joji.Mima@protein.osaka-u.ac.jp

13

14 **Article style:**

15 Research Article

16

17 **Major subject areas:**

18 Biochemistry, Cell Biology

19

20 **Competing interests:**

21 The authors have no competing interests to declare.

22

23 **Funding:**

24 The Ministry of Education, Culture, Sports, Science and Technology, Japan (MEXT) (to Joji Mima)

25

## 26 **Abstract**

27 Membrane tethering is a fundamental reaction to confer the specificity of membrane trafficking  
28 in eukaryotic cells. Although Rab-family GTPases and specific Rab-interacting effector proteins  
29 have been reported to be responsible for membrane tethering, whether and how these key  
30 components directly and specifically tether subcellular membranes still remain enigmatic. Using  
31 the chemically defined systems reconstituted with purified human Rabs and synthetic liposomes,  
32 we now establish that Rab-family GTPases have the conserved function to directly trigger  
33 membrane tethering, even in the absence of any types of Rab effectors. Furthermore, we  
34 strikingly demonstrate that membrane tethering mediated by endosomal Rab11a is selectively  
35 stimulated by the cognate Rab effectors, class V myosins, in a GTP-dependent manner. These  
36 findings postulate the novel concept that Rab proteins are a *bona fide* membrane tether to  
37 physically link two distinct lipid bilayers, and Rab effectors, including class V myosins, are rather a  
38 regulator of Rab-mediated membrane tethering.

39

## 40 **Impact statement**

41 Biochemical reconstitution studies reveal that human Rab GTPases are a *bona fide* membrane  
42 tether and class V myosin motors specifically promote membrane tethering mediated by their  
43 cognate Rab GTPase.

44

## 45 Introduction

46 All eukaryotic cells, from yeast to human cells, deliver the collect sets of the cargoes such as  
47 proteins and lipids to the appropriate cellular compartments including a variety of subcellular  
48 organelles, the plasma membrane, and the extracellular space (**Bonifacino and Glick, 2004**).  
49 These membrane trafficking events are a fundamental and highly selective process in the  
50 eukaryotic endomembrane systems, ensuring that transport vesicles or other membrane-  
51 bounded carriers specifically recognize, physically bind to, and eventually fuse with the target  
52 membranes in a spatiotemporally regulated manner (**Bonifacino and Glick, 2004**). A large body  
53 of prior genetic and biochemical studies have described miscellaneous key protein components  
54 functioning in eukaryotic membrane trafficking, which include SNAREs (soluble *N*-ethylmaleimide-  
55 sensitive factor attachment protein receptors) (**Jahn and Scheller, 2006**), SNARE-binding cofactors  
56 and chaperones such as Sec1/Munc18 proteins (**Baker and Hughson, 2016**), Rab-family small  
57 GTPases (**Stenmark, 2009; Hutagalung and Novick, 2011**), and Rab-interacting proteins termed  
58 “Rab effectors” (**Grosshans et al., 2006; Wandinger-Ness and Zerial, 2014**). Membrane tethering  
59 mediated by Rab GTPases and Rab effectors is generally known to be the first contact between  
60 the transport carriers and the target membranes and thus an essential step to determine the  
61 specificity of intracellular membrane trafficking (**Waters and Pfeffer, 1999; Cai et al., 2007; Yu and**  
62 **Hughson, 2010**), followed by SNARE-mediated membrane fusion, which is another critical layer to  
63 confer the fidelity of membrane trafficking (**Scales et al., 2000; McNew et al., 2000; Parlati et al.,**  
64 **2002; Izawa et al., 2012; Furukawa and Mima, 2014**). However, how Rab GTPases and Rab  
65 effectors work together to specifically drive membrane tethering has still remained elusive  
66 (**Brunet and Sacher, 2014; Tamura and Mima, 2014**), although recent biochemical reconstitution  
67 studies have begun to report the intrinsic membrane tethering potency of specific Rab effectors  
68 (**Yu and Hughson, 2010; Hickey and Wickner, 2010; Ho and Stroupe, 2015; Cheung et al., 2015;**

69 **Ho and Stroupe, 2016; Murray et al., 2016)** and Rab GTPases (**Lo et al., 2012; Tamura and Mima,**  
70 **2014**). In this study, to gain a deeper insight into the mechanisms of intracellular membrane  
71 tethering, we have reconstituted membrane tethering reactions in a chemically defined system  
72 from synthetic liposomes and purified human Rab GTPases and class V myosins as the cognate  
73 effectors of Rab11a, thereby comprehensively investigating their genuine functions in membrane  
74 tethering.

75

## 76 Results and discussion

77 Prior two studies on membrane tethering in a chemically defined reconstitution system have  
78 described that tethering of synthetic liposomes can be directly triggered by several Rab-family  
79 GTPases themselves, which locate and function at the endosomal compartments in yeast (**Lo et**  
80 **al., 2012**) and human cells (**Tamura and Mima, 2014**). This Rab-mediated tethering of liposomal  
81 membranes is an efficient and specific biochemical reaction, as we established that membrane-  
82 anchored human Rab5a rapidly induced the formation of massive liposome clusters, and also that  
83 the tethering activity of Rab5a was able to be strictly and reversibly controlled by the membrane  
84 attachment and detachment of Rab proteins on both apposing membranes (**Tamura and Mima,**  
85 **2014**). These our results strongly suggest the critical requirement of *trans*-Rab-Rab interactions  
86 on two distinct opposing membranes for a reversible membrane tethering event (**Tamura and**  
87 **Mima, 2014**).

88

89 In the current reconstitution study, to further comprehensively investigate the inherent  
90 membrane tethering potency of Rab-family GTPases in human, we purified and tested the six  
91 representative Rab GTPases functioning in the endocytic pathways (Rab4a, Rab5a, Rab7a, Rab9a,  
92 Rab11a, and Rab14) (**Wandinger-Ness and Zerial, 2014**), for typical non-endosomal Rabs, Rab1a  
93 in ER-to-Golgi traffic and Rab3a in exocytosis (**Stenmark, 2009; Hutagalung and Novick, 2011**),  
94 and also HRas for the control protein of a non-Rab small GTPase in the Ras superfamily (**Rojas et**  
95 **al., 2012**) (**Figure 1A**). All of the Rab-family and HRas GTPase proteins were purified as their full-  
96 length forms, consisting of the N-terminal non-conserved flexible segments (5-30 residues), the  
97 conserved globular Ras-superfamily GTPase domains in the middle (160-170 residues), and the  
98 so-called C-terminal hypervariable region (HVR) domains (20-50 residues) (**Rojas et al., 2012**)  
99 (**Figure 1A,B; Figure 1 – figure supplement 1**). In addition to the full-length amino acid sequences

100 of native proteins, to mimic membrane binding and anchoring of native Rab and HRas proteins  
101 through their isoprenyl or palmitoyl lipid anchors at the C-terminus (**Hutagalung and Novick,**  
102 **2011; Rojas et al., 2012**), these recombinant Rab and HRas proteins used here were further  
103 artificially modified with a C-terminal polyhistidine tag (His12), which can be stably associated  
104 with synthetic liposomal membranes bearing a DOGS-NTA lipid (1,2-dioleoyl-sn-glycero-3- $\{[N-(5-$   
105  $\text{amino-1-carboxypentyl})\text{iminodiacetic acid}]$ -succinyl $\}$ ) (**Figure 1B; Figure 2A**). We employed  
106 GTPase activity assays for all of the purified Rab-His12 and HRas-His12 proteins, indicating that  
107 they retained the comparable intrinsic GTPase activities, which specifically converted GTP to GDP  
108 and a free phosphate (**Figure 1C**). Thus, this establishes that purified Rab-His12 and HRas-His12  
109 proteins from the current preparations are all well folded and functionally active in solution  
110 (**Figure 1C**).

111

### 112 **Dissecting the membrane tethering potency of human Rab GTPases in a chemically defined** 113 **reconstitution system**

114 The intrinsic potency of human Rab GTPases to directly drive membrane tethering was thoroughly  
115 evaluated by the kinetics of increase in turbidity of liposome suspensions in the presence of Rab  
116 proteins, which can be monitored by measuring the absorbance at 400 nm (**Figure 2; Figure 3**)  
117 (**Ohki et al., 1982; Hui et al., 2011; Tamura and Mima, 2014; Liu et al., 2015**). Rab-anchored  
118 liposomes were generated with purified Rab-His12 proteins and synthetic liposomes (400 nm in  
119 diameter) bearing a DOGS-NTA lipid and five major lipid species of phosphatidylcholine (PC),  
120 phosphatidylethanolamine (PE), phosphatidylinositol (PI), phosphatidylserine (PS), and  
121 cholesterol, roughly recapitulating lipid compositions of subcellular organelle membranes in  
122 mammalian cells (**Figure 2A**) (**van Meer et al., 2008**). With respect to Rab proteins tested in the  
123 tethering assays, as prior studies using the chemically defined reconstitution system had reported

124 the intrinsic tethering activity of several Rabs in the endocytic trafficking pathways of yeast (the  
125 Rab5 ortholog Vps21p) (Lo et al., 2012) and human cells (Rab5a and Rab7a) (Tamura and Mima,  
126 2014), first we selected six representative endosomal Rabs (Rab4a, Rab5a, Rab7a, Rab9a, Rab11a,  
127 and Rab14) in human for comprehensively analyzing the tethering potency of Rab-family GTPases  
128 (Figure 2B-G). By applying the liposome turbidity assay to the six Rab proteins at variable  
129 concentrations, ranging from 0.5  $\mu$ M to 4  $\mu$ M towards 0.5 mM total lipids in the reactions (Figure  
130 2A), rapid increase in liposome turbidity was triggered specifically either by Rab5a or Rab7a even  
131 at the low protein concentrations (0.5–1.0  $\mu$ M, corresponding to the protein-to-lipid molar ratios  
132 of 1:1000–1:500) (Figure 2C,D). This establishes the very high potency of these two endosomal  
133 Rabs to directly catalyze membrane tethering reactions *in vitro*, consistent with our prior study on  
134 membrane tethering mediated by human Rabs (Tamura and Mima, 2014). Moreover, when  
135 assayed with the high protein concentrations of Rabs such as 4  $\mu$ M (protein-to-lipid ratio, 1:125),  
136 we revealed that not only Rab5a and Rab7a (Figure 2C,D) but also all of the other endosomal Rabs  
137 (Rab4a, Rab9a, Rab11a, and Rab14) retained the significant intrinsic capacity to initiate efficient  
138 tethering of synthetic liposomes by themselves (Figure 2B,E,F,G). These data led us to propose  
139 the conserved function for all the endosomal Rab-family GTPases to physically link two distinct  
140 lipid bilayers together for membrane tethering events.

141

142 To what extent can the Rab protein densities on a membrane surface used in the current  
143 liposome turbidity assays (Figure 2) recapitulate the physiological conditions at subcellular  
144 membranes in mammalian cells? Using synaptic vesicles as a model of a trafficking organelle,  
145 previous comprehensive proteomic and lipidomic analyses of highly purified synaptic vesicles  
146 from rat brain determined the average copy numbers per vesicle of the major protein constituents  
147 including Rab-family GTPases (Takamori et al., 2006). Those quantitative data indicate that, on

148 average, approximately 10 copies of Rab3a and 15 copies of the other Rab GTPases, thus 25 copies  
149 of Rab proteins in total are present in each single purified synaptic vesicle (**Takamori et al., 2006**).  
150 Assuming (i) this copy number of synaptic Rabs (25 copies/vesicle), (ii) a mean outer diameter of  
151 synaptic vesicles of 42 nm (**Takamori et al., 2006**), (iii) a typical bilayer thickness of 4 nm (**Nagle**  
152 **and Tristram-Nagle, 2000**), and (iv) an average area occupied by a single phospholipid molecule  
153 of 0.65 nm<sup>2</sup> (**Nagle and Tristram-Nagle, 2000**), we estimated the surface areas of the outer and  
154 inner lipid layers of synaptic vesicles (5,540 nm<sup>2</sup> and 3,630 nm<sup>2</sup>, respectively) that bore 14,100  
155 lipid molecules in total, thereby giving approximately the Rab protein-to-lipid molar ratio of 1:560  
156 (25 Rabs/vesicle, 14,100 lipids/vesicle). It should be noted that, in the current chemically defined  
157 system, Rab5a and Rab7a (at least) can trigger rapid and efficient membrane tethering at the Rab-  
158 to-lipid molar ratio of 1:500 (**Figure 2C,D**, black bold lines), which is almost identical to the  
159 physiological ratio calculated above (Rab-to-lipid, 1:560). In addition to the Rab-to-lipid molar  
160 ratios, we also quantitatively estimated the membrane surface areas occupied by Rab proteins in  
161 the current reconstitution experiments (**Figure 2**). Assuming that (i) Rab proteins are typically a  
162 spherical 25 kDa protein with an average radius of 2.0 nm (**Erickson, 2009**), (ii) all of the Rab-His12  
163 molecules added to the reactions are stably attached to liposomal membranes containing a DOGS-  
164 NTA lipid (**Figure 2A**), and (iii) a single 400-nm-diameter liposome contains 1,520,000 lipid  
165 molecules (the total surface area, 985,000 nm<sup>2</sup>; the surface area/lipid, 0.65 nm<sup>2</sup>) (**Nagle and**  
166 **Tristram-Nagle, 2000**), the percentages of the membrane surface coverage by Rab proteins were  
167 calculated to be in the range of 3.79% to 30.3% (0.5 μM – 4.0 μM Rab proteins; the Rab-to-lipid  
168 ratio, 1:1000 – 1:125) (**Figure 2**). These estimated values of the surface coverage by Rab proteins  
169 reflect that Rab proteins occupy only a minor portion of the membrane surface areas of liposomes  
170 in the turbidity assays and thus appear to have plenty of space to interact and cooperate with  
171 other proteins and lipids on the membranes. Taken together, the Rab-to-lipid molar ratios and



172 membrane surface areas occupied by Rabs that we estimated above support the idea that  
173 endosomal Rab proteins can drive rapid and efficient membrane tethering *in vitro* under the  
174 physiological or physiologically relevant conditions mimicking subcellular membranes in  
175 mammalian cells.

176

177 Our data of the current liposome turbidity assays have revealed the conserved membrane  
178 tethering potency of endosomal Rab proteins in the context of a physiologically relevant function  
179 (**Figure 2B-G**). Next, we asked whether the intrinsic membrane tethering potency of human Rabs  
180 is the specialized function exclusively for Rab-family small GTPase proteins among the Ras  
181 superfamily GTPases (**Rojas et al., 2012**) and, moreover, for the Rab proteins that are specifically  
182 localized at the endosomal compartments. To address this, we performed the turbidity assays for  
183 the HRas protein as the model of a non-Rab Ras-superfamily GTPase (**Figure 3A,B**) and for two of  
184 the well-studied non-endosomal Rab proteins, Rab1a in ER-to-Golgi traffic and Rab3a in exocytosis  
185 (**Figure 3A,C,D**), with the same range of the protein concentrations as tested in **Figure 2B-G** (0.5  
186  $\mu\text{M}$  – 4.0  $\mu\text{M}$  HRas or Rab proteins; the protein-to-lipid molar ratios, 1:1000 – 1:125). Indeed,  
187 HRas had little membrane tethering potency, giving no significant increase in the turbidity of  
188 liposomes when assayed even at the highest HRas protein concentrations of 4.0  $\mu\text{M}$  (HRas-to-lipid,  
189 1:125) (**Figure 3B**). Nevertheless, both of the non-endosomal Rab GTPases tested, Rab1a and  
190 Rab3a, retained the intrinsic capacity to directly induce efficient membrane tethering of synthetic  
191 liposomes (**Figure 3C,D**), as shown earlier with six endosomal Rabs in **Figure 2**. It should be noted  
192 that the difference of the *in vitro* membrane tethering potency between different Rab-family  
193 members and also between Rab proteins and HRas is not simply relied on their attachment to  
194 liposomal membranes in the tethering reactions (**Figure 4**). To examine the membrane association  
195 of Rab and HRas proteins in the current reconstitution systems, liposome co-sedimentation assays

196 were employed (**Figure 4A**) with the same experimental conditions as in the liposome turbidity  
197 assays (**Figure 2, Figure 3**; protein-to-lipid, 1:500), demonstrating that all the tested Rab-family  
198 and HRas proteins bound were able to comparably and stably bind to liposomal membranes  
199 (**Figure 4B,C,D,E,F,G,H,I,J**). Thus, our data from the turbidity assays (**Figure 2, Figure 3**) suggest  
200 that the intrinsic potency to physically tether two apposed membranes is selectively encoded in  
201 the Rab-family members among the Ras-superfamily GTPases and likely to be fully conserved  
202 through all the Rab-family members functioning in the endocytic and secretory pathways.

203

204 To further confirm the intrinsic membrane tethering capacity of Rab-family GTPases as their  
205 genuine function, we employed fluorescence microscopic observations of the reconstituted  
206 reactions of Rab-mediated membrane tethering (**Figure 5**). The tethering reactions were  
207 incubated with rhodamine (Rh)-labeled fluorescent liposomes (0.5 mM lipids; 1000 nm diameter)  
208 and Rab-family or HRas proteins (4  $\mu$ M proteins; protein-to-lipid, 1:125) (**Figure 5A**) as in the  
209 liposome turbidity assays (**Figure 2; Figure 3**). Strikingly, whereas only small particles of non-  
210 tethered liposomes were observed when incubated in the absence of any Rab proteins (**Figure**  
211 **5B,C**) or with the control HRas protein (**Figure 5T,U**), all of the tested endosomal and non-  
212 endosomal Rab proteins (Rab4a, Rab5a, Rab7a, Rab9a, Rab11a, Rab14, Rab1a, and Rab3a) were  
213 able to specifically induce the formation of substantial massive clusters of liposomes (**Figure 5D-**  
214 **S**). Liposome clusters observed in the fluorescence images were then quantitatively analyzed for  
215 the particle size distributions (**Figure 6A**), yielding the average sizes of Rab-mediated liposome  
216 clusters ranging from 7.8  $\mu$ m<sup>2</sup> to 55  $\mu$ m<sup>2</sup>, which are much larger than those of the control reactions  
217 (0.92  $\mu$ m<sup>2</sup> and 0.80  $\mu$ m<sup>2</sup> for the reactions without any Rabs and with HRas, respectively) (**Figure**  
218 **6B**). These our morphological analyses of Rab-mediated membrane tethering reactions by  
219 fluorescence microscopy were fully consistent with the results obtained in the liposome turbidity

220 assays (**Figure 2; Figure 3**), thus further establishing the working model that Rab-family proteins  
221 themselves can be a *bona fide* membrane tether to directly and physically link two distinct lipid  
222 bilayers of subcellular membranes in intracellular membrane tethering.

223

224 **Class V myosins, the Rab11a effectors, strongly and selectively promote membrane tethering**  
225 **mediated by the cognate Rab GTPase**

226 By comprehensively and quantitatively characterizing *in vitro* membrane tethering reactions  
227 reconstituted with chemically defined lipid bilayers and purified recombinant proteins of eight Rab  
228 GTPases in human (Rab1a, Rab3a, Rab4a, Rab5a, Rab7a, Rab9a, Rab11a, and Rab14) (**Figure 1;**  
229 **Figure 2; Figure 3; Figure 4; Figure 5; Figure 6**), we now establish that Rab-family proteins  
230 genuinely have the intrinsic potency to directly and specifically tether two distinct lipid bilayers  
231 together in the context of a physiologically relevant function. Nevertheless, it is noteworthy that  
232 there appears to be wide variability in the tethering capacity of human Rab-family GTPases,  
233 although Rab proteins share the highly conserved amino acid sequences and tertiary structures  
234 for their Ras-superfamily GTPase domains (**Figure 1A; Figure 1 – figure supplement 1**) (**Rojas et**  
235 **al., 2012; Khan and Ménétrey, 2013**), which exhibited comparable GTP-hydrolysis activities for all  
236 the eight Rabs tested (**Figure 1C**). For typical instances of variability in the Rab-mediated tethering  
237 potency, Rab5a and Rab7a were able to trigger rapid membrane tethering at the protein-to-lipid  
238 molar ratios of 1:500 (**Figure 2C,D**, black bold lines), whereas most of the other Rabs (Rab1a,  
239 Rab4a, Rab9a, Rab11a, and Rab14) showed little or no tethering activity under the same  
240 conditions of the Rab density on the membrane surface (Rab-to-lipid, 1:500) (**Figure 2B,E,F,G,**  
241 **black bold lines; Figure 3C**, black bold lines). These results led us to hypothesize that (i) the  
242 intrinsic tethering activity of Rab proteins is negatively autoregulated in general, especially in the  
243 case of the Rabs that cause very slow and inefficient membrane tethering by themselves (Rab1a,

244 Rab4a, Rab9a, Rab11a, and Rab14) and thus (ii) specific Rab-interacting proteins (Rab effectors)  
245 drastically enhance the capacity of their cognate Rabs to drive membrane tethering. To test this  
246 hypothesis, we next attempted to reconstitute membrane tethering reactions with Rab11a, which  
247 had exhibited the lowest tethering potency among the eight Rabs tested in the earlier liposome  
248 turbidity assays (**Figure 2F**), and the cognate Rab11a effectors, class V myosin motor proteins  
249 (Myo5A and Myo5B) (**Figure 7**). Although any Rab11a effectors identified, except for the  
250 Exoc6/Sec15 exocyst subunit (**Zhang et al., 2004; Wu et al., 2005; Wu and Guo, 2015**), have never  
251 been proposed or reported to be directly involved in membrane tethering events (**Stenmark,**  
252 **2009; Hutagalung and Novick, 2011; Wandinger-Ness and Zerial, 2014**), it has been thought that,  
253 as Rab effectors, class V myosins directly bind and cooperate with the cognate Rab11a on  
254 transport vesicles to regulate the specificity of membrane trafficking (**Lapierre et al., 2001;**  
255 **Hammer and Wu, 2002; Hammer and Sellers, 2012; Lindsay et al., 2013**).

256

257 To reconstitute the Rab11a- and class V myosin-dependent membrane tethering reaction in a  
258 chemically defined system, we purified the globular tail domains of class V myosin proteins  
259 (Myo5A-GTD and Myo5B-GTD) in human, which correspond to the C-terminal residues 1534-1855  
260 of myosin 5a (Myo5A) and the residues 1526-1848 of myosin 5b (Myo5B) (**Figure 7A,B**). It should  
261 be noted that previous biochemical and structural studies indicated that these globular tail  
262 domains of Myo5A and Myo5B were necessary and sufficient for binding to Rab11a (**Figure 7A**)  
263 (**Roland et al., 2011; Lindsay et al., 2013; Pylypenko et al., 2013; Pylypenko et al., 2016**). Using  
264 purified Myo5A-GTD and Myo5B-GTD proteins (**Figure 7B**), we employed liposome turbidity  
265 assays to test whether class V myosin proteins have an effect on membrane tethering reactions  
266 mediated by the cognate Rab11a (**Figure 7C,D,E**). Strikingly, Rab11a-mediated tethering was  
267 strongly promoted by addition of an equimolar amount (1  $\mu$ M) or a 2-fold molar excess (2  $\mu$ M) of

268 Myo5A-GTD (**Figure 7D**) or Myo5B-GTD (**Figure 7E**) over Rab11a (1  $\mu$ M; Rab-to-lipid ratio, 1:500),  
269 exhibiting much higher initial rates of the turbidity increase than those in the absence of Myo5-  
270 GTD proteins. Morphological changes of liposomes in the tethering reactions with Rab11a and  
271 Myo5-GTDs were also analyzed by fluorescence microscopy (**Figure 7F,G,H,I,J,K**), indicating that  
272 Rab11a and Myo5-GTD proteins synergistically and specifically induced the formation of massive  
273 clusters of liposomes (**Figure 7J,K**). Thus, the current results from these two independent assays  
274 in a chemically defined system uncover the novel function of class V myosins to directly support  
275 membrane tethering mediated by their cognate Rab11a GTPase.

276

277 Since class V myosins are recognized as Rab effectors that, in general, selectively interact with  
278 the GTP-bound form of Rab proteins (**Hammer and Sellers, 2012**), we next tested the guanine  
279 nucleotide dependence of Rab11a- and Myo5-GTD-mediated membrane tethering by employing  
280 the liposome turbidity assays (**Figure 8A**). Indeed, the addition of GTP (1 mM) drastically  
281 stimulated the synergistic action of Rab11a and Myo5A-GTD (**Figure 8B**, blue lines) or Myo5B-GTD  
282 (**Figure 8C**, blue lines) upon driving rapid membrane tethering, but the presence of GTP had no  
283 effect on the tethering reactions bearing either Rab11a or Myo5-GTD proteins alone (**Figure 8B,C**,  
284 black and red lines). This direct stimulation by GTP on Rab11a/Myo5-GTD-dependent membrane  
285 tethering was shown as a very specific effect when added the variable GTP concentrations ranging  
286 from 1  $\mu$ M to 1 mM (**Figure 8D,E**) and assayed with the other guanine nucleotides, GDP and GTP $\gamma$ S  
287 (**Figure 8F,G**). Our data therefore reflect that Myo5-GTD proteins greatly enhance the tethering  
288 activity of Rab11a in a GTP-dependent manner, suggesting that the direct and stable interactions  
289 of Myo5-GTD proteins with membrane-bound Rab11a-GTP proteins are required for facilitating  
290 membrane tethering. To experimentally test the association of Myo5-GTD proteins with Rab11a  
291 proteins on liposomal membranes, liposome co-sedimentation assays were performed under the

292 typical conditions used for the turbidity assays in **Figure 8** (Rab-to-lipid ratio, 1:500; Rab-to-Myo5-  
293 GTD ratio, 1:1; 1 mM GTP) (**Figure 9A**). However, we found that the amounts of Myo5A-GTD  
294 (**Figure 9B**, ppt) and Myo5B-GTD (**Figure 9E**, ppt) bound to and co-isolated with Rab11a-attached  
295 liposomes were comparable to those of the control reactions with protein-free liposomes in the  
296 absence of Rab11a-His12 (**Figure 9C,F**, ppt) or in the presence of untagged Rab11a lacking a His12  
297 tag (**Figure 9D,G**, ppt). This indicates, unexpectedly, that the membrane association of Myo5-GTD  
298 proteins was not significantly promoted by the recruitment of Rab11a on a liposomal membrane  
299 surface. Considering that rapid and efficient Rab11a-mediated membrane tethering is definitely  
300 relied on the presence of Myo5-GTD proteins and GTP in the current reconstitution system (**Figure**  
301 **7; Figure 8**), our results from the co-sedimentation assays (**Figure 9**) may imply that the transient  
302 interactions between Rab11a and Myo5-GTD proteins on a membrane surface are essential for  
303 cooperatively accelerating membrane tethering reactions.

304

305 Our current studies have uncovered the novel function of class V myosins to directly promote  
306 membrane tethering mediated by their cognate Rab11a GTPase in a GTP-dependent manner, by  
307 thoroughly characterizing reconstituted membrane tethering in the chemically defined systems  
308 with purified Rab11a and Myo5-GTD proteins (**Figure 7; Figure 8; Figure 9**). However, it could still  
309 be argued that Myo5-GTD proteins can non-physiologically induce tethering or aggregation of  
310 liposomal membranes coated by other non-cognate Rab-His12 proteins or even coated by any  
311 types of soluble proteins modified with a polyhistidine tag. In this context, to more strictly validate  
312 the specificity of Rab11a/Myo5-GTD-dependent membrane tethering, we further explored the  
313 liposome turbidity assays in the presence of Myo5-GTD proteins (**Figure 10A**), not only for the  
314 cognate Rab11a but also for the other four Rab proteins including Rab1a, Rab4a, Rab9a, and  
315 Rab14, which had shown relatively slow and inefficient membrane tethering by themselves,

316 similar to Rab11a (**Figure 2; Figure 3**). Although Rab11a and either Myo5A-GTD or Myo5B-GTD  
317 proteins synergistically triggered very rapid and efficient membrane tethering (**Figure 10B,C**, blue  
318 lines), fully consistent with the earlier results in **Figure 8**, these Myo5-GTD proteins indeed had  
319 only minor or little effect on the tethering potency of Rab1a, Rab4a, Rab9a, and Rab14 (**Figure**  
320 **10B,C**, green, black, cyan, and red lines). Thus, our data faithfully reflect that both Myo5A-GTD  
321 and Myo5B-GTD recognize and act upon exclusively the cognate Rab11a at the membrane surface  
322 of lipid bilayers, thereby selectively activating Rab11a-mediated membrane tethering reactions.  
323 The current findings from reconstituted membrane tethering with purified Rab and Myo5-GTD  
324 proteins (**Figure 7; Figure 8; Figure 9; Figure 10**) provide new insights into how Rab GTPases on  
325 subcellular membranes (transport vesicles, organelle membranes, or the plasma membrane) and  
326 class V myosin motors on actin cytoskeletal tracks cooperate with each other to promote  
327 membrane tethering and how their functions synergistically contribute to the spatiotemporal  
328 specificity of membrane tethering and beyond.

329

### 330 **Conclusions**

331 Membrane tethering is one of the most critical and important processes to determine the  
332 specificity of membrane traffic in eukaryotic endomembrane systems, delivering the correct sets  
333 of cargoes (proteins, lipids, etc.) to the correct locations (organelles, the plasma membrane, the  
334 extracellular space, etc.) (**Waters and Pfeffer, 1999**). From a large body of prior studies using  
335 genetic, cell biological, biochemical, and structural biological approaches on this essential  
336 membrane tethering process, we generally recognize that a number of diverse but specific types  
337 of “Rab effectors” have been described as the so-called “tethering factors”, such as coiled-coil  
338 tethering proteins and multisubunit tethering complexes (**Yu and Hughson, 2010; Chia and**  
339 **Gleeson, 2014; Kuhlee et al., 2015**). However, for the most cases, it remains ambiguous indeed

340 whether these “tethering factors” identified are a *bona fide* membrane tether that physically links  
341 two distinct opposing membranes by itself or, furthermore, whether they are even involved  
342 directly in membrane tethering events (**Brunet and Sacher, 2014**). In this context, in order to  
343 thoroughly define and characterize the molecular functions in membrane tethering for Rab-family  
344 GTPases and class V myosin cytoskeletal motor proteins as the specific Rab effectors, we have  
345 undertaken to recapitulate the membrane tethering machinery in the chemically defined systems  
346 reconstituted with synthetic lipid bilayers of liposomes and purified proteins of human Rab  
347 GTPases and class V myosins (**Figure 1; Figure 2; Figure 7**).

348

349 Our current *in vitro* reconstitution studies present three new findings supporting the working  
350 model of intracellular membrane tethering mediated by Rab-family GTPases as a genuine  
351 membrane tether: (1) All the eight Rab proteins tested, including both endosomal and non-  
352 endosomal Rabs, have the intrinsic capacity to physically tether two apposed membranes under  
353 the experimental conditions mimicking the lipid composition and Rab density of subcellular  
354 organelles/vesicles in mammalian cells, establishing the conserved tethering function of the Rab-  
355 family members (**Figure 2; Figure 3; Figure 5**). (2) The tethering capacity of Rab proteins is a  
356 specific function among the Ras superfamily GTPases and yet highly variable for each of different  
357 Rab proteins (**Figure 2; Figure 3; Figure 5**). This suggests that the Rab subfamily-specific (RabSF)  
358 motifs could be the regions responsible for controlling the membrane tethering potency of each  
359 Rab (**Pereira-Leal and Seabra, 2000; Stein et al., 2012**). Finally, (3) the Rab effectors, class V  
360 myosins, can drastically and specifically promote membrane tethering mediated by their cognate  
361 Rab GTPase, Rab11a, in a GTP-dependent manner (**Figure 7; Figure 8; Figure 10**). This finding  
362 leads us to hypothesize that cytoskeletal motor proteins, including class V myosins and also  
363 microtubule-based motor proteins, act as “tethering factors” (not “tethers”) that directly and



364 positively regulate Rab-mediated membrane tethering (**Hammer and Wu, 2002; Akhmanova and**  
365 **Hammer, 2010**). Understanding a detailed picture of the protein machinery of Rab-mediated  
366 membrane tethering will need further studies using a chemically defined reconstitution system,  
367 which may focus on testing tethering by the heterotypic Rab combinations, determining the  
368 specific regions in Rab molecules responsible for tethering, and reconstituting Rab-mediated  
369 tethering in the presence of different types of Rab effectors.  
370

## 371 **Materials and methods**

### 372 **Protein expression and purification**

373 The coding sequences for the eight isoforms of Rab-family GTPases (Rab1a, Rab3a, Rab4a, Rab5a,  
374 Rab7a, Rab9a, Rab11a, and Rab14) in human and for human HRas GTPase were amplified by  
375 polymerase chain reaction (PCR) with Human Universal QUICK-Clone cDNA II (Clontech, Mountain  
376 View, CA) as a template cDNA and KOD-Plus-Neo DNA polymerase (Toyobo, Osaka, Japan), as  
377 described (**Tamura and Mima, 2014**). The amplified PCR fragments contained the sequence  
378 encoding a human rhinovirus (HRV) 3C protease site (Leu-Glu-Val-Leu-Phe-Gln-Gly-Pro) upstream  
379 of the initial ATG codons and the sequence encoding polyhistidine residues (His12) downstream  
380 of the codons for a C-terminal residue, yielding the full-length Rab and HRas proteins with three  
381 extra N-terminal residues (Gly-Pro-Gly) and a C-terminal His12 tag after HRV 3C protease cleavage.  
382 For Rab11a, the PCR fragment without the polyhistidine-coding sequence was also amplified as  
383 above, to prepare the Rab11a protein lacking the C-terminal His12 tag (untagged Rab11a). All of  
384 these PCR fragments for the Rab-family and HRas GTPases were inserted into a pET-41 Ek/LIC  
385 vector (Novagen, Madison, WI), which is designed to express an N-terminal GST-His6-tagged  
386 protein, by the ligation-independent cloning method (Novagen).

387

388 Recombinant Rab and HRas proteins were expressed in the *Escherichia coli* BL21(DE3) cells  
389 (Novagen) harboring the pET-41-based vectors in Lysogeny Broth (LB) medium (1 liter each) with  
390 kanamycin (50 µg/ml) by induction with 0.1 mM IPTG at 37°C for 3 hours. *E. coli* cells harvested  
391 after IPTG induction were resuspended in 40 ml each of RB150 (20 mM Hepes-NaOH, pH 7.4, 150  
392 mM NaCl, 10% glycerol) containing 0.1 mM GTP, 5mM MgCl<sub>2</sub>, 1 mM DTT, 1 mM PMSF, and 1.0  
393 µg/ml pepstatin A, freeze-thawed in a liquid nitrogen and a water bath at 30°C, lysed by sonication  
394 using UD-201 ultrasonic disrupter (Tomy Seiko, Tokyo, Japan), and then ultracentrifuged at 50,000

395 rpm for 75 min at 4°C with a 70 Ti rotor (Beckman Coulter, Indianapolis, IN). The supernatants  
396 obtained were mixed with COSMOGEL GST-Accept beads (50% slurry, 4 ml each; Nacalai Tesque,  
397 Kyoto, Japan) and were incubated at 4°C for 2 hours with gentle agitation to isolate GST-His6-  
398 tagged Rab-His12 and HRas-His12 proteins. The protein-bound GST-Accept beads were washed  
399 four times in RB150 containing 5 mM MgCl<sub>2</sub> and 1 mM DTT (8 ml each), resuspended in the same  
400 buffer (4 ml each), supplemented with HRV 3C protease (4 units/ml final; Novagen), and incubated  
401 without agitation (4°C, 16 hours) to cleave off and elute Rab-His12 and HRas-His12 proteins. After  
402 centrifugation of the bead suspensions (15,300 g, 10 min, 4°C), purified Rab-His12 and HRas-His12  
403 proteins were harvested from the supernatants.

404

405 For class V myosins, the coding sequences of the globular tail domains of human myosin 5a  
406 (Myo5A-GTD; residues 1534-1855) and myosin 5b (Myo5B-GTD; residues 1526-1848) with the  
407 sequence encoding a HRV 3C-protease site upstream of the initial codons were amplified by PCR  
408 as above and then cloned into a pET-30 Ek/LIC vector (Novagen) expressing an N-terminal His6-  
409 tagged protein. Recombinant Myo5A-GTD (1534-1855) and Myo5B-GTD (1526-1848) proteins  
410 were expressed in the *E. coli* BL21(DE3) cells harboring the pET-30-based vectors in LB medium  
411 with kanamycin (1 liter each) by induction with 0.1 mM IPTG (16°C, 16 hours). *E. coli* cells were  
412 resuspended in 40 ml each of RB150 containing MgCl<sub>2</sub> (5 mM), DTT (1 mM), PMSF (1 mM), and  
413 pepstatin A (1.0 µg/ml), followed by freeze-thaw treatment, sonication, and ultracentrifugation as  
414 above. The supernatants were mixed with Complete His-Tag Purification Resin beads (50% slurry,  
415 4 ml each; Roche, Basel, Switzerland) and were incubated at 4°C for 2 hours with gentle agitation  
416 to isolate His6-tagged Myo5A-GTD and Myo5B-GTD proteins. The protein-bound beads were  
417 washed four times in RB150 containing 5 mM MgCl<sub>2</sub>, 1 mM DTT, and 20 mM imidazole (8 ml each),  
418 resuspended in the same buffer (2 ml each) containing HRV 3C protease (15 units/ml; Novagen),

419 and incubated with gentle agitation (4°C, 16 hours). After centrifugation of the bead suspensions  
420 (15,300 g, 10 min, 4°C), purified Myo5A-GTD and Myo5B-GTD proteins, which had been cleaved  
421 off from the beads, were harvested from the supernatants and dialyzed against RB150 containing  
422 5 mM MgCl<sub>2</sub> and 1 mM DTT.

423

#### 424 **GTPase activity assay**

425 GTP-hydrolysis activities of human Rab-family and HRas GTPases were assayed by quantitating  
426 released free phosphate molecules during the hydrolytic reactions, using the Malachite Green-  
427 based reagent Biomol Green (Enzo Life Sciences, Farmingdale, NY) as described (**Tamura and**  
428 **Mima, 2014; Sugiura and Mima, 2016**), with modifications. Purified recombinant Rab-family and  
429 HRas proteins (2 μM final) were incubated at 30°C for 1 hour in RB150 containing 6 mM MgCl<sub>2</sub>, 1  
430 mM DTT, and 1 mM GTP or GTPγS. After a 1-hour incubation, the reaction mixtures (50 μl each)  
431 were supplemented with the Biomol Green reagent (50 μl each), further incubated at 30°C for 30  
432 min, and measured for absorbance at 620 nm in a clear 96-well microplate (Falcon no. 351172;  
433 Corning, Corning, NY) using the SpectraMax Paradigm plate reader with the ABS-MONO cartridge  
434 (Molecular Devices, Sunnyvale, CA). All of the data obtained were corrected by subtracting the  
435 absorbance values of the control reactions without any Rab and HRas GTPases. To calculate the  
436 concentrations of released phosphate molecules in the reactions, phosphate standard samples  
437 (2.5 – 160 μM final; Enzo Life Sciences) were also incubated and assayed using the same protocol.  
438 Means and standard deviations of the specific GTPase activities for purified Rab-family and HRas  
439 proteins (μM phosphate/min/μM protein) were determined from three independent experiments.

440

#### 441 **Liposome preparation**

442 All of the non-fluorescent lipids were purchased from Avanti Polar Lipids (Alabaster, AL).

443 Fluorescent lipids, Rh-PE and FL-PE, were obtained from Molecular Probes (Eugene, OR). Lipid  
444 mixes for the Rh-labeled liposomes used in liposome turbidity assays, fluorescence microscopy,  
445 and liposome co-sedimentation assays contained 1-palmitoyl-2-oleoyl-PC (POPC) [42% (mol/mol)],  
446 POPE (16.5%), soy PI (10%), POPS (5%), cholesterol (20%), DOGS-NTA (6%), and Rh-PE (0.5%).  
447 Dried lipid films harboring the physiological mimic lipid composition (**van Meer et al., 2008**;  
448 **Tamura and Mima, 2014**) were completely resuspended in RB150 containing 5 mM MgCl<sub>2</sub> and 1  
449 mM DTT by vortexing, yielding 8 mM total lipids in final, then incubated at 37°C for 1 hour with  
450 shaking, freeze-thawed in liquid N<sub>2</sub> and a water bath at 30°C, and extruded 21 times through  
451 polycarbonate filters (pore diameter, 400 or 1000 nm; Avanti Polar Lipids) in a mini-extruder  
452 (Avanti Polar Lipids) at 40°C. Lipid concentrations of the extruded liposomes were determined  
453 from the fluorescence of Rh-PE ( $\lambda_{ex} = 550$  nm,  $\lambda_{em} = 590$  nm) and FL-PE ( $\lambda_{ex} = 486$  nm,  $\lambda_{em} =$   
454 529 nm) using the SpectraMax Paradigm plate reader with the TUNE cartridge (Molecular Devices)  
455 and a black 384-well plate (Corning no. 3676; Corning). Liposome solutions were diluted with  
456 RB150 containing 5 mM MgCl<sub>2</sub> and 1 mM DTT to 5 mM total lipids in final and stored at 4°C.

457

#### 458 **Liposome turbidity assay**

459 Membrane tethering of Rab GTPase-anchored liposomes was monitored by turbidity changes of  
460 liposome solutions as described (**Ohki et al., 1982**; **Hui et al., 2011**; **Tamura and Mima, 2014**; **Liu**  
461 **et al., 2015**), with modifications. After preincubating liposome suspensions and Rab protein  
462 solutions separately at 30°C for 10 min, liposomes (400 nm diameter; 0.5 mM total lipids in final)  
463 were mixed with Rab proteins (0.5 – 4.0  $\mu$ M in final) in RB150 containing 5 mM MgCl<sub>2</sub> and 1 mM  
464 DTT (total 150  $\mu$ l for each), immediately followed by measuring the absorbance changes of the  
465 liposome suspensions at 400 nm in a DU720 spectrophotometer (Beckman Coulter) at room  
466 temperature for 300 sec. For the assays with class V myosins, Rab proteins (1  $\mu$ M final) were

467 preincubated at 30°C for 30 min in the presence of Myo5A-GTD or Myo5B-GTD (0.5 – 2.0  $\mu$ M final)  
468 before mixing with liposomes. All liposome turbidity data were obtained from one experiment  
469 and were typical of those from more than three independent experiments.

470

#### 471 **Liposome co-sedimentation assay**

472 Rh-labeled liposome suspensions (400 nm diameter; 1 mM total lipids in final) were mixed with  
473 purified Rab, HRas, or BSA proteins (2  $\mu$ M in final) in RB150 containing 5 mM MgCl<sub>2</sub> and 1 mM DTT  
474 (100  $\mu$ l each) and subsequently incubated at 30°C for 30 min. For the experiments with class V  
475 myosins, the reaction mixtures were further supplemented with GTP (1 mM final) and Myo5A-  
476 GTD or Myo5B-GTD (2  $\mu$ M final). After incubation, these reactions were ultracentrifuged at 50,000  
477 rpm for 30 min at 4°C with a TLA100 rotor and an Optima TLX ultracentrifuge (Beckman Coulter).  
478 The pellets and supernatants obtained were analyzed by SDS-PAGE and Coomassie Blue staining.

479

#### 480 **Fluorescence microscopy**

481 After separately preincubating liposome suspensions and Rab protein solutions at 30°C for 10 or  
482 30 min, liposomes (1000 nm diameter; 0.5 or 0.8 mM total lipids in final) and Rab proteins (3.0 or  
483 4.0  $\mu$ M final) were mixed in RB150 containing 5 mM MgCl<sub>2</sub> and 1 mM DTT (total 50  $\mu$ l for each),  
484 further incubated at 30°C for 30 min or 1 hour, transferred to ice, and subjected to fluorescence  
485 microscopy. For the reactions with class V myosins, Rab11a-His12 (3  $\mu$ M final) was preincubated  
486 in the presence of Myo5A-GTD or Myo5B-GTD (3  $\mu$ M final) at 30°C for 30 min before incubating  
487 with liposomes. A drop of the incubated reactions (5  $\mu$ l each) was placed on a microscope slide  
488 (S2111; Matsunami Glass, Kishiwada, Japan) and covered with an 18-mm coverslip (Matsunami  
489 Glass). Fluorescence microscopy was performed using a BZ-9000 fluorescence microscope  
490 (Keyence, Osaka, Japan) equipped with Plan Apo 40X NA 0.95 and Plan Apo VC 100X NA 1.40 oil

491 objective lenses (Nikon, Tokyo, Japan) and TRITC and GFP-BP filters (Keyence). Digital images  
492 obtained were processed using the BZ-II viewer application (Keyence) and the ImageJ2 software  
493 (National Institutes of Health, Bethesda, MD). Particle sizes of Rab-mediated liposome clusters  
494 were measured using ImageJ2 after setting the lower intensity threshold level to 100 and the  
495 upper intensity threshold level to 255 (**Stroupe et al., 2009; Hickey and Wickner, 2010**).  
496

497 **Acknowledgements**

498 We thank Dr. Naoki Tamura (Institute for Protein Research, Osaka University; now Fukushima  
499 Medical University School of Medicine) for valuable suggestions on this project and for substantial  
500 contributions to preparing the expression vectors for human Rab GTPases. We are grateful to Drs.  
501 Junichi Takagi and Yukiko Matsunaga (Institute for Protein Research, Osaka University) for access  
502 to fluorescence microscopy experiments. This study was in part supported by the Program to  
503 Disseminate Tenure Tracking System from the Ministry of Education, Culture, Sports, Science and  
504 Technology, Japan (MEXT) and Grants-in-Aid for Scientific Research from MEXT (to JM).

505

506 **Author contributions**

507 JM designed the research; JM and MI performed the experiments; JM and MI analyzed the data;  
508 JM wrote the manuscript.

509



## 510 References

- 511 **Akhmanova A**, Hammer JA 3rd. 2010. Linking molecular motors to membrane cargo. *Current*  
512 *Opinion in Cell Biology* **22**:479-487.  
513 [doi: 10.1016/j.ceb.2010.04.008](https://doi.org/10.1016/j.ceb.2010.04.008)  
514
- 515 **Baker RW**, Hughson FM. 2016. Chaperoning SNARE assembly and disassembly. *Nature Reviews*  
516 *Molecular Cell Biology* **17**:465-479.  
517 [doi: 10.1038/nrm.2016.65](https://doi.org/10.1038/nrm.2016.65)  
518
- 519 **Bonifacino JS**, Glick BS. 2004. The mechanisms of vesicle budding and fusion. *Cell* **116**:153-166.  
520 [doi: 10.1016/S0092-8674\(03\)01079-1](https://doi.org/10.1016/S0092-8674(03)01079-1)  
521
- 522 **Brunet S**, Sacher M. 2014. Are all multisubunit tethering complexes bona fide tethers? *Traffic*  
523 **15**:1282-1287.  
524 [doi: 10.1111/tra.12200](https://doi.org/10.1111/tra.12200)  
525
- 526 **Cai H**, Reinisch K, Ferro-Novick S. 2007. Coats, tethers, Rabs, and SNAREs work together to mediate  
527 the intracellular destination of a transport vesicle. *Developmental Cell* **12**:671-682.  
528 [doi: 10.1016/j.devcel.2007.04.005](https://doi.org/10.1016/j.devcel.2007.04.005)  
529
- 530 **Cheung PY**, Limouse C, Mabuchi H, Pfeffer SR. 2015. Protein flexibility is required for vesicle  
531 tethering at the Golgi. *eLife* **4**:e12790.  
532 [doi: 10.7554/eLife.12790](https://doi.org/10.7554/eLife.12790)  
533
- 534 **Chia PZ**, Gleeson PA. 2014. Membrane tethering. *F1000Prime Reports* **6**:74.  
535 [doi: 10.12703/P6-74](https://doi.org/10.12703/P6-74)  
536
- 537 **Erickson HP**. 2009. Size and shape of protein molecules at the nanometer level determined by  
538 sedimentation, gel filtration, and electron microscopy. *Biological Procedures Online* **11**:32-51.  
539 [doi: 10.1007/s12575-009-9008-x](https://doi.org/10.1007/s12575-009-9008-x)  
540
- 541 **Furukawa N**, Mima J. 2014. Multiple and distinct strategies of yeast SNAREs to confer the  
542 specificity of membrane fusion. *Scientific Reports* **4**:4277.  
543 [doi: 10.1038/srep04277](https://doi.org/10.1038/srep04277)  
544
- 545 **Grosshans BL**, Ortiz D, Novick P. 2006. Rabs and their effectors: achieving specificity in membrane  
546 traffic. *Proceedings of the National Academy of Sciences of USA* **103**:11821-11827.  
547 [doi: 10.1073/pnas.0601617103](https://doi.org/10.1073/pnas.0601617103)  
548
- 549 **Hammer JA 3rd**, Sellers JR. 2012. Walking to work: roles for class V myosins as cargo transporters.  
550 *Nature Reviews Molecular Cell Biology* **13**:13-26.  
551 [doi: 10.1038/nrm3248](https://doi.org/10.1038/nrm3248)  
552
- 553 **Hammer JA 3rd**, Wu XS. 2002. Rabs grab motors: defining the connections between Rab GTPases  
554 and motor proteins. *Current Opinion in Cell Biology* **14**:69-75.  
555 [doi: 10.1016/S0955-0674\(01\)00296-4](https://doi.org/10.1016/S0955-0674(01)00296-4)

- 556  
557 **Hickey CM**, Wickner W. 2010. HOPS initiates vacuole docking by tethering membranes before  
558 trans-SNARE complex assembly. *Molecular Biology of the Cell* **21**:2297-2305.  
559 [doi: 10.1091/mbc.E10-01-0044](https://doi.org/10.1091/mbc.E10-01-0044)  
560  
561 **Ho R**, Stroupe C. 2015. The HOPS/class C Vps complex tethers membranes by binding to one Rab  
562 GTPase in each apposed membrane. *Molecular Biology of the Cell* **26**:2655-2663.  
563 [doi: 10.1091/mbc.E14-04-0922](https://doi.org/10.1091/mbc.E14-04-0922)  
564  
565 **Ho R**, Stroupe C. 2016. The HOPS/class C Vps complex tethers high-curvature membranes via a  
566 direct protein-membrane interaction. *Traffic* **17**:1078-1090.  
567 [doi: 10.1111/tra.12421](https://doi.org/10.1111/tra.12421)  
568  
569 **Hui E**, Gaffaney JD, Wang Z, Johnson CP, Evans CS, Chapman ER. 2011. Mechanism and function of  
570 synaptotagmin-mediated membrane apposition. *Nature Structural & Molecular Biology* **18**:813-  
571 821.  
572 [doi: 10.1038/nsmb.2075](https://doi.org/10.1038/nsmb.2075)  
573  
574 **Hutagalung AH**, Novick PJ. 2011. Role of Rab GTPases in membrane traffic and cell physiology.  
575 *Physiological Reviews* **91**:119-149.  
576 [doi: 10.1152/physrev.00059.2009](https://doi.org/10.1152/physrev.00059.2009)  
577  
578 **Izawa R**, Onoue T, Furukawa N, Mima J. 2012. Distinct contributions of vacuolar Qabc- and R-  
579 SNARE proteins to membrane fusion specificity. *The Journal of Biological Chemistry* **287**:3445-  
580 3453.  
581 [doi: 10.1074/jbc.M111.307439](https://doi.org/10.1074/jbc.M111.307439)  
582  
583 **Jahn R**, Scheller RH. 2006. SNAREs--engines for membrane fusion. *Nature Reviews Molecular Cell*  
584 *Biology* **7**:631-643.  
585 [doi: 10.1038/nrm2002](https://doi.org/10.1038/nrm2002)  
586  
587 **Khan AR**, Ménétrey J. 2013. Structural biology of Arf and Rab GTPases' effector recruitment and  
588 specificity. *Structure* **21**:1284-1297.  
589 [doi: 10.1016/j.str.2013.06.016](https://doi.org/10.1016/j.str.2013.06.016)  
590  
591 **Kuhlee A**, Raunser S, Ungermann C. 2015. Functional homologies in vesicle tethering. *FEBS Letters*  
592 **589**:2487-2497.  
593 [doi: 10.1016/j.febslet.2015.06.001](https://doi.org/10.1016/j.febslet.2015.06.001)  
594  
595 **Lapierre LA**, Kumar R, Hales CM, Navarre J, Bhartur SG, Burnette JO, Provance DW Jr, Mercer JA,  
596 Bähler M, Goldenring JR. 2001. Myosin Vb is associated with plasma membrane recycling systems.  
597 *Molecular Biology of the Cell* **12**:1843-1857.  
598 [doi: 10.1091/mbc.12.6.1843](https://doi.org/10.1091/mbc.12.6.1843)  
599  
600 **Lindsay AJ**, Jollivet F, Horgan CP, Khan AR, Raposo G, McCaffrey MW, Goud B. 2013. Identification  
601 and characterization of multiple novel Rab-myosin Va interactions. *Molecular Biology of the Cell*  
602 **24**:3420-3434.  
603 [doi: 10.1091/mbc.E13-05-0236](https://doi.org/10.1091/mbc.E13-05-0236)

- 604  
605 **Liu TY**, Bian X, Romano FB, Shemesh T, Rapoport TA, Hu J. 2015. Cis and trans interactions between  
606 atlastin molecules during membrane fusion. *Proceedings of the National Academy of Sciences of*  
607 *USA* **112**:E1851-E1860.  
608 [doi: 10.1073/pnas.1504368112](https://doi.org/10.1073/pnas.1504368112)  
609  
610 **Lo SY**, Brett CL, Plemel RL, Vignali M, Fields S, Gonen T, Merz AJ. 2012. Intrinsic tethering activity  
611 of endosomal Rab proteins. *Nature Structural & Molecular Biology* **19**:40-47.  
612 [doi: 10.1038/nsmb.2162](https://doi.org/10.1038/nsmb.2162)  
613  
614 **McNew JA**, Parlati F, Fukuda R, Johnston RJ, Paz K, Paumet F, Söllner TH, Rothman JE. 2000.  
615 Compartmental specificity of cellular membrane fusion encoded in SNARE proteins. *Nature*  
616 **407**:153-159.  
617 [doi: 10.1038/35025000](https://doi.org/10.1038/35025000)  
618  
619 **Murray DH**, Jahnel M, Lauer J, Avellaneda MJ, Brouilly N, Cezanne A, Morales-Navarrete H, Perini  
620 ED, Ferguson C, Lupas AN, Kalaidzidis Y, Parton RG, Grill SW, Zerial M. 2016. An endosomal tether  
621 undergoes an entropic collapse to bring vesicles together. *Nature* **537**:107-111.  
622 [doi: 10.1038/nature19326](https://doi.org/10.1038/nature19326)  
623  
624 **Nagle JF**, Tristram-Nagle S. 2000. Structure of lipid bilayers. *Biochimica et Biophysica Acta*  
625 **1469**:159-195.  
626 [doi: 10.1016/S0304-4157\(00\)00016-2](https://doi.org/10.1016/S0304-4157(00)00016-2)  
627  
628 **Ohki S**, Düzgüneş N, Leonards K. 1982. Phospholipid vesicle aggregation: effect of monovalent and  
629 divalent ions. *Biochemistry* **21**:2127-2133.  
630 [doi: 10.1021/bi00538a022](https://doi.org/10.1021/bi00538a022)  
631  
632 **Parlati F**, Varlamov O, Paz K, McNew JA, Hurtado D, Söllner TH, Rothman JE. 2002. Distinct SNARE  
633 complexes mediating membrane fusion in Golgi transport based on combinatorial specificity.  
634 *Proceedings of the National Academy of Sciences of USA* **99**:5424-5429.  
635 [doi: 10.1073/pnas.082100899](https://doi.org/10.1073/pnas.082100899)  
636  
637 **Pereira-Leal JB**, Seabra MC. 2000. The mammalian Rab family of small GTPases: definition of  
638 family and subfamily sequence motifs suggests a mechanism for functional specificity in the Ras  
639 superfamily. *Journal of Molecular Biology* **301**:1077-1087.  
640 [doi: 10.1006/jmbi.2000.4010](https://doi.org/10.1006/jmbi.2000.4010)  
641  
642 **Pylypenko O**, Attanda W, Gauquelin C, Lahmani M, Coulibaly D, Baron B, Hoos S, Titus MA, England  
643 P, Houdusse AM. 2013. Structural basis of myosin V Rab GTPase-dependent cargo recognition.  
644 *Proceedings of the National Academy of Sciences of USA* **110**:20443-20448.  
645 [doi: 10.1073/pnas.1314329110](https://doi.org/10.1073/pnas.1314329110)  
646  
647 **Pylypenko O**, Welz T, Tittel J, Kollmar M, Chardon F, Malherbe G, Weiss S, Michel CI, Samol-Wolf  
648 A, Grasskamp AT, Hume A, Goud B, Baron B, England P, Titus MA, Schwille P, Weidemann T,  
649 Houdusse A, Kerkhoff E. 2016. Coordinated recruitment of Spir actin nucleators and myosin V  
650 motors to Rab11 vesicle membranes. *eLife* **5**:e17523.  
651 [doi: 10.7554/eLife.17523](https://doi.org/10.7554/eLife.17523)

- 652  
653 **Rojas AM**, Fuentes G, Rausell A, Valencia A. 2012. The Ras protein superfamily: evolutionary tree  
654 and role of conserved amino acids. *The Journal of Cell Biology* **196**:189-201.  
655 [doi: 10.1083/jcb.201103008](https://doi.org/10.1083/jcb.201103008)  
656  
657 **Roland JT**, Bryant DM, Datta A, Itzen A, Mostov KE, Goldenring JR. 2011. Rab GTPase-Myo5B  
658 complexes control membrane recycling and epithelial polarization. *Proceedings of the National*  
659 *Academy of Sciences of USA* **108**:2789-2794.  
660 [doi: 10.1073/pnas.1010754108](https://doi.org/10.1073/pnas.1010754108)  
661  
662 **Scales SJ**, Chen YA, Yoo BY, Patel SM, Doung YC, Scheller RH. 2000. SNAREs contribute to the  
663 specificity of membrane fusion. *Neuron* **26**:457-464.  
664 [doi: 10.1016/S0896-6273\(00\)81177-0](https://doi.org/10.1016/S0896-6273(00)81177-0)  
665  
666 **Stein M**, Pilli M, Bernauer S, Habermann BH, Zerial M, Wade RC. 2012. The interaction properties  
667 of the human Rab GTPase family--comparative analysis reveals determinants of molecular binding  
668 selectivity. *PLoS One* **7**:e34870.  
669 [doi: 10.1371/journal.pone.0034870](https://doi.org/10.1371/journal.pone.0034870)  
670  
671 **Stenmark H**. 2009. Rab GTPases as coordinators of vesicle traffic. *Nature Reviews Molecular Cell*  
672 *Biology* **10**:513-525.  
673 [doi: 10.1038/nrm2728](https://doi.org/10.1038/nrm2728)  
674  
675 **Stroupe C**, Hickey CM, Mima J, Burfeind AS, Wickner W. 2009. Minimal membrane docking  
676 requirements revealed by reconstitution of Rab GTPase-dependent membrane fusion from  
677 purified components. *Proceedings of the National Academy of Sciences of USA* **106**:17626-17633.  
678 [doi: 10.1073/pnas.0903801106](https://doi.org/10.1073/pnas.0903801106)  
679  
680 **Sugiura S**, Mima J. 2016. Physiological lipid composition is vital for homotypic ER membrane fusion  
681 mediated by the dynamin-related GTPase Sey1p. *Scientific Reports* **6**:20407.  
682 [doi: 10.1038/srep20407](https://doi.org/10.1038/srep20407)  
683  
684 **Takamori S**, Holt M, Stenius K, Lemke EA, Grønborg M, Riedel D, Urlaub H, Schenck S, Brügger B,  
685 Ringler P, Müller SA, Rammner B, Gräter F, Hub JS, De Groot BL, Mieskes G, Moriyama Y, Klingauf  
686 J, Grubmüller H, Heuser J, Wieland F, Jahn R. 2006. Molecular anatomy of a trafficking organelle.  
687 *Cell* **127**:831-846.  
688 [doi: 10.1016/j.cell.2006.10.030](https://doi.org/10.1016/j.cell.2006.10.030)  
689  
690 **Tamura N**, Mima J. 2014. Membrane-anchored human Rab GTPases directly mediate membrane  
691 tethering *in vitro*. *Biology Open* **3**:1108-1115.  
692 [doi: 10.1242/bio.20149340](https://doi.org/10.1242/bio.20149340)  
693  
694 **van Meer G**, Voelker DR, Feigenson GW. 2008. Membrane lipids: where they are and how they  
695 behave. *Nature Reviews Molecular Cell Biology* **9**:112-124.  
696 [doi: 10.1038/nrm2330](https://doi.org/10.1038/nrm2330)  
697  
698 **Wandinger-Ness A**, Zerial M. 2014. Rab proteins and the compartmentalization of the endosomal  
699 system. *Cold Spring Harbor Perspectives in Biology* **6**:a022616.

700 [doi: 10.1101/cshperspect.a022616](https://doi.org/10.1101/cshperspect.a022616)

701

702 **Waters MG**, Pfeffer SR. 1999. Membrane tethering in intracellular transport. *Current Opinion in*  
703 *Cell Biology* **11**:453-459.

704 [doi:10.1016/S0955-0674\(99\)80065-9](https://doi.org/10.1016/S0955-0674(99)80065-9)

705

706 **Wu B**, Guo W. 2015. The exocyst at a glance. *Journal of Cell Science* **128**:2957-2964.

707 [doi: 10.1242/jcs.156398](https://doi.org/10.1242/jcs.156398)

708

709 **Wu S**, Mehta SQ, Pichaud F, Bellen HJ, Quijcho FA. 2005. Sec15 interacts with Rab11 via a novel  
710 domain and affects Rab11 localization in vivo. *Nature Structural Molecular Biology* **12**:879-885.

711 [doi: 10.1038/nsmb987](https://doi.org/10.1038/nsmb987)

712

713 **Yu IM**, Hughson FM. 2010. Tethering factors as organizers of intracellular vesicular traffic. *Annual*  
714 *Review of Cell and Developmental Biology* **26**:137-156.

715 [doi: 10.1146/annurev.cellbio.042308.113327](https://doi.org/10.1146/annurev.cellbio.042308.113327)

716

717 **Zhang XM**, Ellis S, Sriratana A, Mitchell CA, Rowe T. 2004. Sec15 is an effector for the Rab11 GTPase  
718 in mammalian cells. *The Journal of Biological Chemistry* **279**:43027-43034.

719 [doi: 10.1074/jbc.M402264200](https://doi.org/10.1074/jbc.M402264200)

720

721 **Figure legends**

722 **Figure 1.** Purification of human Rab GTPases used in this reconstitution study.

723 **(A)** Schematic representation of the endosomal Rabs (Rab4a, Rab5a, Rab7a, Rab9a, Rab11a, and  
724 Rab14), non-endosomal Rabs (Rab1a and Rab3a), and HRas GTPase in human, showing their  
725 amino acid residues, domains (Ras-superfamily GTPase domains and hypervariable regions), and  
726 intracellular locations, which include early endosome (EE), recycling endosome (RE), plasma  
727 membrane (PM), late endosome (LE), lysosome (Ly), endoplasmic reticulum (ER), Golgi, and  
728 secretory vesicle (SV).

729 **(B)** Coomassie Blue-stained gels of purified recombinant proteins of the C-terminally His12-tagged  
730 endosomal Rab, non-endosomal Rab, and HRas GTPases and the untagged form of Rab11a used  
731 in this study.

732 **(C)** Intrinsic GTP-hydrolysis activities of purified Rab proteins. Purified Rab-His12, HRas-His12, and  
733 untagged Rab11a proteins (2  $\mu$ M) were incubated at 30°C for 1 h in RB150 containing MgCl<sub>2</sub> (6  
734 mM), DTT (1 mM), and GTP (1 mM) or GTP $\gamma$ S (1 mM) for the control, followed by assaying released  
735 free phosphate molecules using a Malachite Green-based reagent.

736

737 **Figure 1 – figure supplement 1.** Amino acid sequence alignment of the Rab- and Ras-family  
738 GTPases in human used in this study. Multiple alignment of the sequences was performed using  
739 Clustal W (<http://www.genome.jp/tools/clustalw/>) and ESPript 3.0  
740 (<http://espript.ibcp.fr/ESPript/ESPript/>).

741

742 **Figure 2.** Endosomal Rab GTPases directly initiate membrane tethering by themselves in a  
743 chemically defined reconstitution system.

744 **(A)** Schematic representation of liposome turbidity assays for testing Rab-mediated liposome

745 tethering in **B-G**.

746 (**B-G**) Endosomal Rab-His12 proteins (0.5 – 4  $\mu$ M each), Rab4a-His12 (**B**), Rab5a-His12 (**C**), Rab7a-  
747 His12 (**D**), Rab9a-His12 (**E**), Rab11a-His12 (**F**), and Rab14-His12 (**G**), were incubated with synthetic  
748 liposomes bearing physiological mimic lipid composition (400 nm diameter; 0.5 mM lipids) in  
749 RB150 containing MgCl<sub>2</sub> (5 mM) and DTT (1 mM) at room temperature for 300 sec. During  
750 incubation, turbidity changes of the Rab-liposome mixed reactions were monitored by measuring  
751 the absorbance at 400 nm. The protein-to-lipid molar ratios used for these turbidity reactions  
752 were from 1:1000 to 1:125, as indicated.

753

754 **Figure 3.** Non-endosomal Rab GTPases have the inherent potency to specifically mediate  
755 membrane tethering.

756 (**A**) Schematic representation of liposome turbidity assays for the non-Rab Ras superfamily GTPase,  
757 HRas, and non-endosomal Rab GTPases, Rab1a in ER-Golgi traffic and Rab3a in exocytosis, in **B-D**.  
758 (**B-D**) Liposome turbidity assays were employed as in **Figure 2B-G**, with HRas-His12 (**B**), Rab1a-  
759 His12 (**C**), and Rab3a-His12 (**D**) proteins (0.5 – 4  $\mu$ M each in final) and physiological mimic synthetic  
760 liposomes (0.5 mM total lipids in final). The protein-to-lipid molar ratios used were indicated.

761

762 **Figure 4.** Membrane association of Rab-His12 proteins onto DOGS-NTA-bearing liposomes.

763 (**A**) Schematic representation of liposome co-sedimentation assays for testing membrane  
764 attachment of Rab-His12 proteins used in **Figure 2** and **Figure 3**.

765 (**B-K**) Rh-labeled liposomes (400 nm diameter; 1 mM total lipids in final) were incubated (30°C, 30  
766 min) with Rab4a-His12 (**B**), Rab5a-His12 (**C**), Rab7a-His12 (**D**), Rab9a-His12(**E**), Rab11a-His12 (**F**),  
767 Rab14-His12 (**G**), Rab1a-His12 (**H**), Rab3a-His12 (**I**), HRas-His12 (**J**), and BSA for a negative control  
768 (**K**) (2  $\mu$ M final for each), and ultracentrifuged (50,000 rpm, 30 min, 4°C). The supernatants (sup)

769 and precipitates (ppt) obtained were analyzed by SDS-PAGE and Coomassie Blue staining.

770

771 **Figure 5.** Rab-mediated membrane tethering induces the formation of massive liposome clusters.

772 **(A)** Schematic representation of fluorescence microscopic observations of Rab-mediated liposome  
773 clusters.

774 **(B-U)** Fluorescence images **(B, D, F, H, J, L, N, P, R, T)** and bright field images **(C, E, G, I, K, M, O, Q,**  
775 **S, U)** of Rab-mediated liposome clusters. Fluorescently-labeled liposomes bearing Rh-PE (1000  
776 nm diameter; 0.5 mM lipids in final) were incubated at 30°C for 1 h, in the absence **(B, C)** and  
777 presence of the Rab- and Ras-family GTPases (4 μM each in final), including Rab4a-His12 **(D, E)**,  
778 Rab5a-His12 **(F, G)**, Rab7a-His12 **(H, I)**, Rab9a-His12 **(J, K)**, Rab11a-His12 **(L, M)**, Rab14-His12 **(N,**  
779 **O)**, Rab1a-His12 **(P, Q)**, Rab3a-His12 **(R, S)**, and HRas-His12 **(T, U)**, and subjected to fluorescence  
780 microscopy. Scale bars: 20 μm.

781

782 **Figure 6.** Particle size distributions of liposome clusters induced by Rab-mediated membrane  
783 tethering.

784 **(A)** Particle sizes of the Rab-mediated liposome clusters observed in the fluorescence images of  
785 **Figure 5.**

786 **(B)** Particle numbers and average sizes of the Rab-mediated liposome clusters observed in the  
787 fluorescence images of **Figure 5.**

788

789 **Figure 7.** Class V myosin globular tail domains, Myo5A-GTD and Myo5B-GTD, strongly stimulate  
790 Rab11a-dependent membrane tethering.

791 **(A)** Schematic representation of class V myosins in human, Myo5A and Myo5B, showing their  
792 amino acid residues and domains including myosin motor domains, IQ motifs, coiled coil regions,



793 and globular tail domains (GTDs). Representative Myo5-interacting Rab GTPases and the Rab-  
794 binding regions in Myo5A and Myo5B are indicated.

795 **(B)** The Coomassie Blue-stained gel of purified Myo5A-GTD and Myo5B-GTD proteins, which are  
796 comprised of the amino acid residues 1534-1855 and 1526-1848, respectively.

797 **(C)** Schematic representation of liposome turbidity assays for testing Rab11a- and Myo5-GTD-  
798 dependent liposome tethering in **D, E**.

799 **(D, E)** Liposome turbidity assays were employed with Rab11a-His12 (1  $\mu$ M final) as in **Figure 2F**,  
800 but in the presence of Myo5A-GTD (**D**) and Myo5B-GTD (**E**) (0.5 – 2  $\mu$ M final).

801 **(F-K)** Fluorescence images of Rab11a-mediated liposome clusters in the presence of Myo5-GTDs.  
802 Rab11a-His12 (3  $\mu$ M final) and Myo5A-GTD or Myo5B-GTD (3  $\mu$ M final) were preincubated at 30°C  
803 for 30 min, mixed with Rh-labeled liposomes (1000 nm diameter; 0.8 mM lipids in final), further  
804 incubated (30°C, 30 min), and subjected to fluorescence microscopy (**J, K**). For a control, Rab11a-  
805 His12, Myo5-GTD, or both were omitted from the reactions where indicated (**F-I**). Scale bars: 20  
806  $\mu$ m.

807

808 **Figure 8.** Guanine nucleotide dependence of Rab11a-mediated membrane tethering in the  
809 presence of Myo5A-GTD and Myo5B-GTD.

810 **(A)** Schematic representation of liposome turbidity assays for testing Rab11a- and Myo5-GTD-  
811 dependent liposome tethering in the presence of GTP in **B-G**.

812 **(B, C)** Rab11a/Myo5-dependent membrane tethering is strongly and specifically promoted by the  
813 addition of GTP. Liposome turbidity assays with Rab11a-His12 (1  $\mu$ M) and Myo5A-GTD (1  $\mu$ M) (**B**)  
814 or Myo5B-GTD (2  $\mu$ M) (**C**) were performed as in **Figure 7D, E**, but in the presence of GTP (1 mM).

815 **(D, E)** Liposome turbidity assays were employed with Rab11a-His12 and Myo5A-GTD (**D**) or  
816 Myo5B-GTD (**E**) as in **B, C**, in the presence of various concentrations of GTP (1  $\mu$ M – 1 mM).

817 (F, G) Liposome turbidity assays were employed with Rab11a-His12 and Myo5A-GTD (F) or Myo5B-  
818 GTD (G) as in B, C, in the presence of GTP, GTP $\gamma$ S, and GDP (1 mM for each).

819

820 **Figure 9.** Membrane association of Myo5-GTD proteins onto Rab11a-anchored liposomes.

821 (A) Schematic representation of liposome co-sedimentation assays for testing membrane binding  
822 of Myo5A-GTD and Myo5B-GTD to Rab11a-bound liposomes.

823 (B-G) Liposome co-sedimentation assays were employed as in Figure 4, with Rh-labeled liposomes  
824 (400 nm diameter; 1 mM lipids) and Rab11a-His12 (2  $\mu$ M) (B, E), but in the presence of Myo5A-  
825 GTD (2  $\mu$ M) (B-D), Myo5B-GTD (2  $\mu$ M) (E-G), and GTP (1 mM). For a control, the reactions without  
826 Rab11a-His12 (C, F) or with the untagged form of Rab11a lacking a His12 tag (untagged Rab11a)  
827 (D, G) were also tested. The supernatants (sup) and precipitates (ppt) obtained were analyzed by  
828 SDS-PAGE and Coomassie Blue staining.

829

830 **Figure 10.** Myo5A-GTD and Myo5B-GTD selectively activate Rab11a-dependent membrane  
831 tethering.

832 (A) Schematic representation of liposome turbidity assays in B, C, for the various Rab GTPases  
833 (Rab11a, Rab1a, Rab4a, Rab9a, and Rab14) in the presence of Myo5-GTDs and GTP.

834 (B, C) Myo5-GTDs specifically promote efficient membrane tethering mediated by the cognate Rab  
835 GTPase, Rab11a. Liposome turbidity assays were employed with Myo5A-GTD (B) or Myo5B-GTD  
836 (C) and GTP, as in Figure 8B, C, but for Rab11a, Rab1a, Rab4a, Rab9a, and Rab14 GTPases.

837

**Figure 1.** Inoshita & Mima

**A**

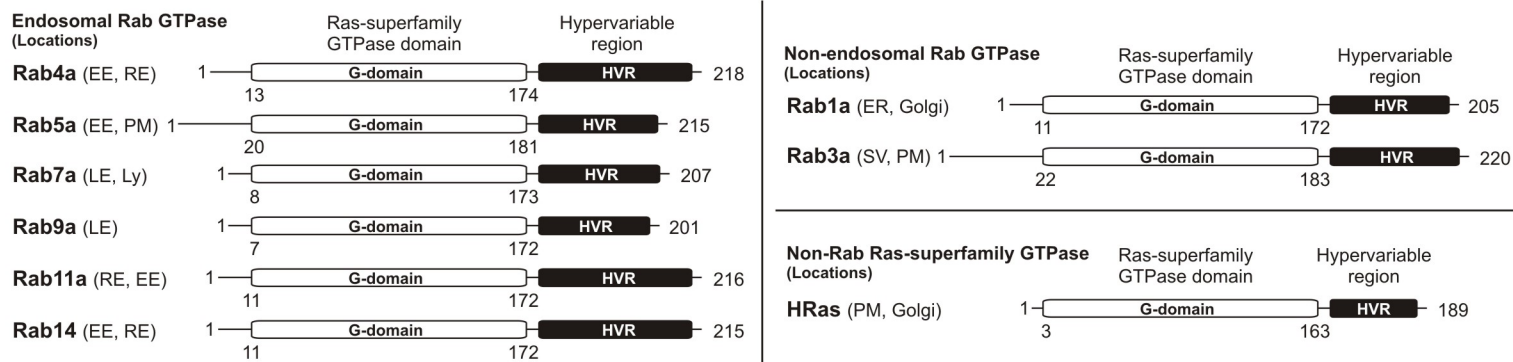

**B**

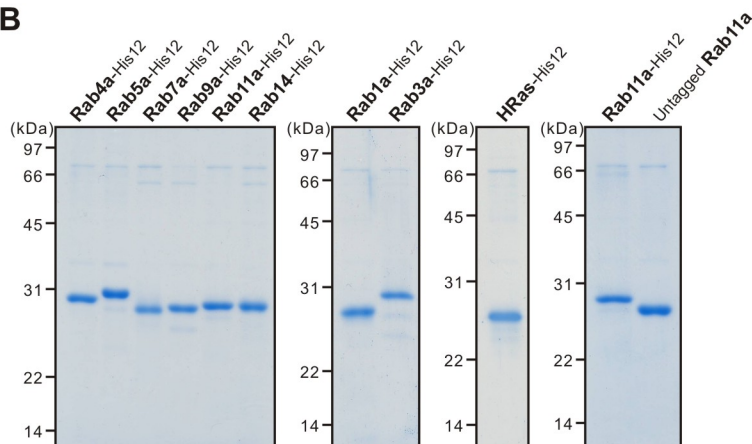

**C**

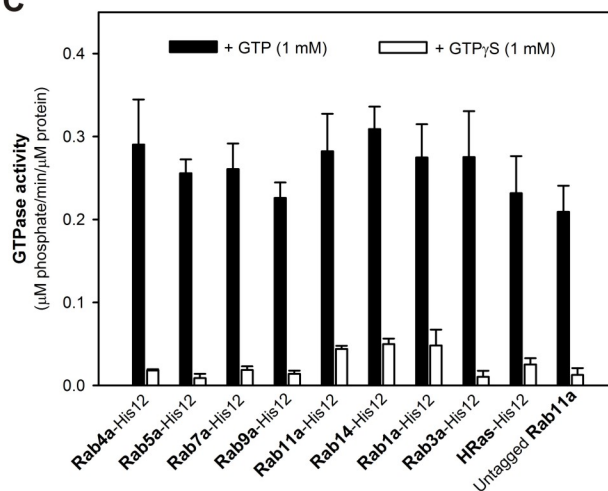

**Figure 1. Purification of human Rab GTPases used in this reconstitution study.**

(A) Schematic representation of the endosomal Rabs (Rab4a, Rab5a, Rab7a, Rab9a, Rab11a, and Rab14), non-endosomal Rabs (Rab1a and Rab3a), and HRas GTPase in human, showing their amino acid residues, domains (Ras-superfamily GTPase domains and hypervariable regions), and intracellular locations, which include early endosome (EE), recycling endosome (RE), plasma membrane (PM), late endosome (LE), lysosome (Ly), endoplasmic reticulum (ER), Golgi, and secretory vesicle (SV).

(B) Coomassie Blue-stained gels of purified recombinant proteins of the C-terminally His12-tagged endosomal Rab, non-endosomal Rab, and HRas GTPases and the untagged form of Rab11a used in this study.

(C) Intrinsic GTP-hydrolysis activities of purified Rab proteins. Purified Rab-His12, HRas-His12, and untagged Rab11a proteins (2  $\mu$ M) were incubated at 30°C for 1 h in RB150 containing MgCl<sub>2</sub> (6 mM), DTT (1 mM), and GTP (1 mM) or GTP $\gamma$ S (1 mM) for the control, followed by assaying released free phosphate molecules using a Malachite Green-based reagent.

**Figure 1 - figure supplement 1.** Inoshita & Mima

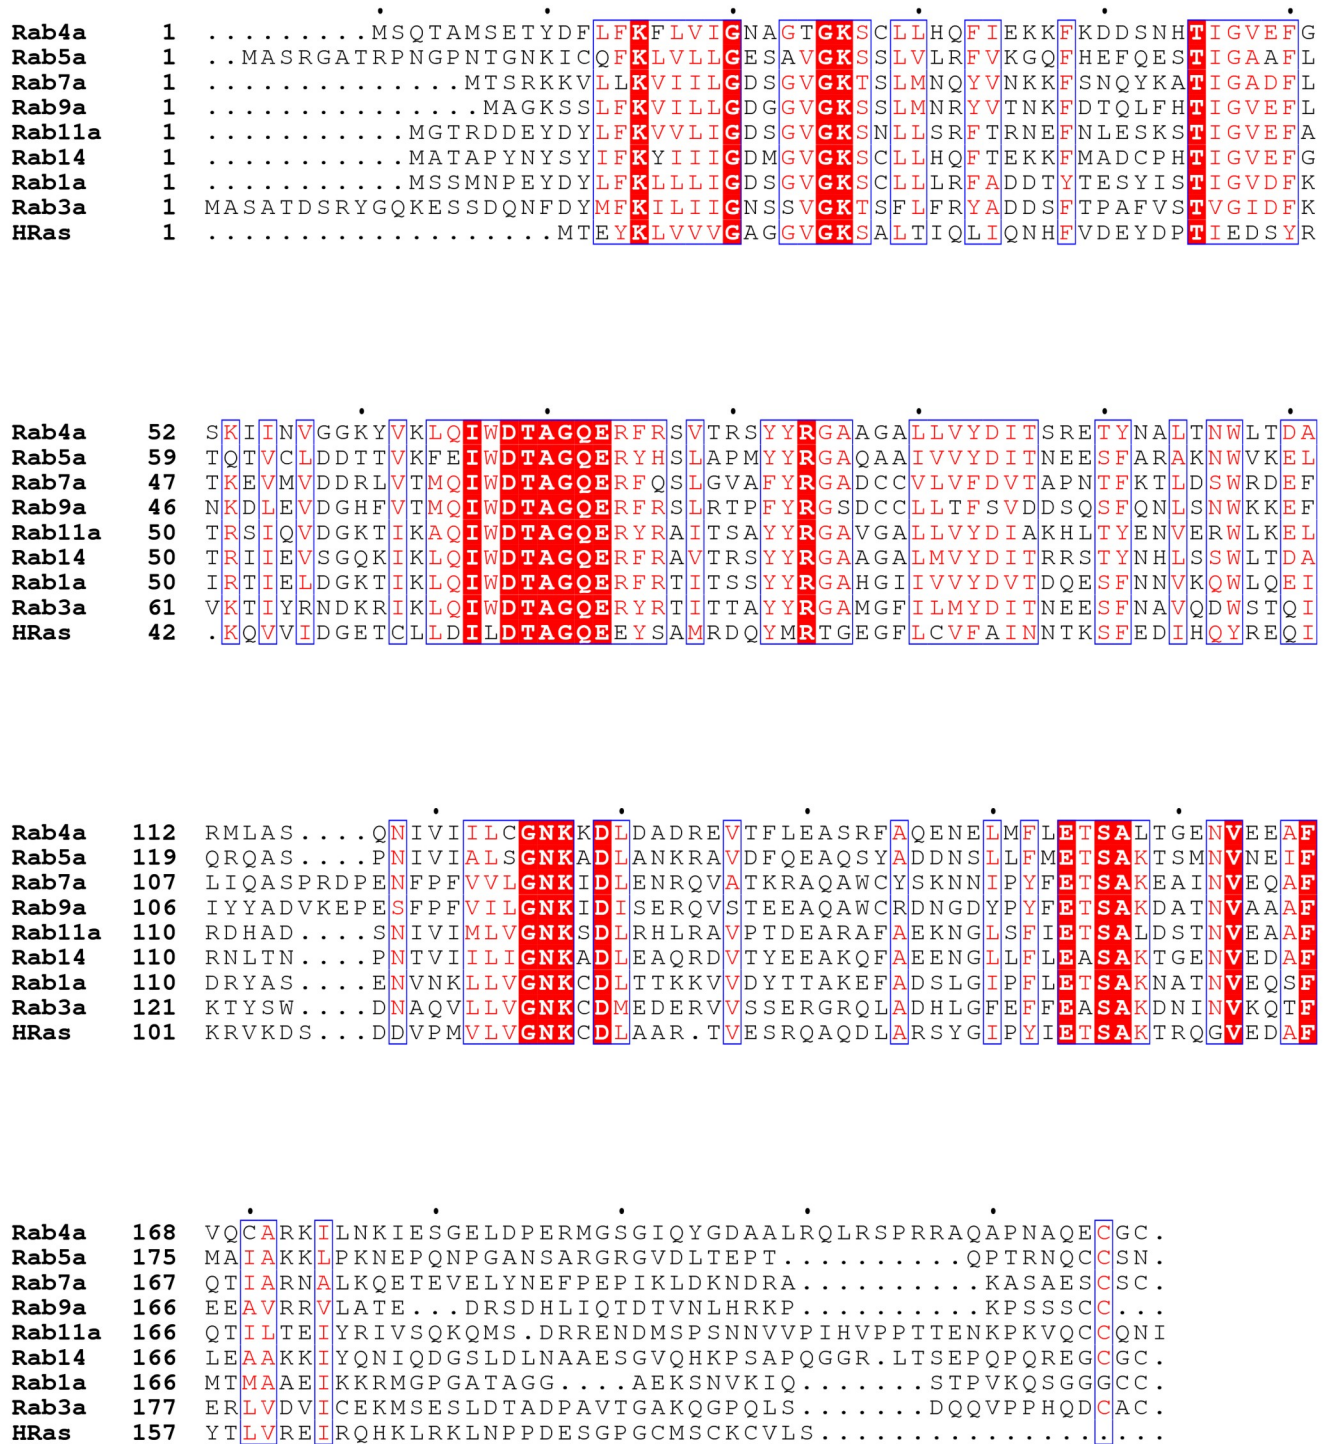

**Figure 1 - figure supplement 1.** Amino acid sequence alignment of the Rab- and Ras-family GTPases in human used in this study. Multiple alignment of the sequences was performed using ClustalW (<http://www.genome.jp/tools/clustalw/>) and ESPrnt 3.0 (<http://esprnt.ibcp.fr/ESPrnt/ESPrnt/>).

**Figure 2.** Inoshita & Mima

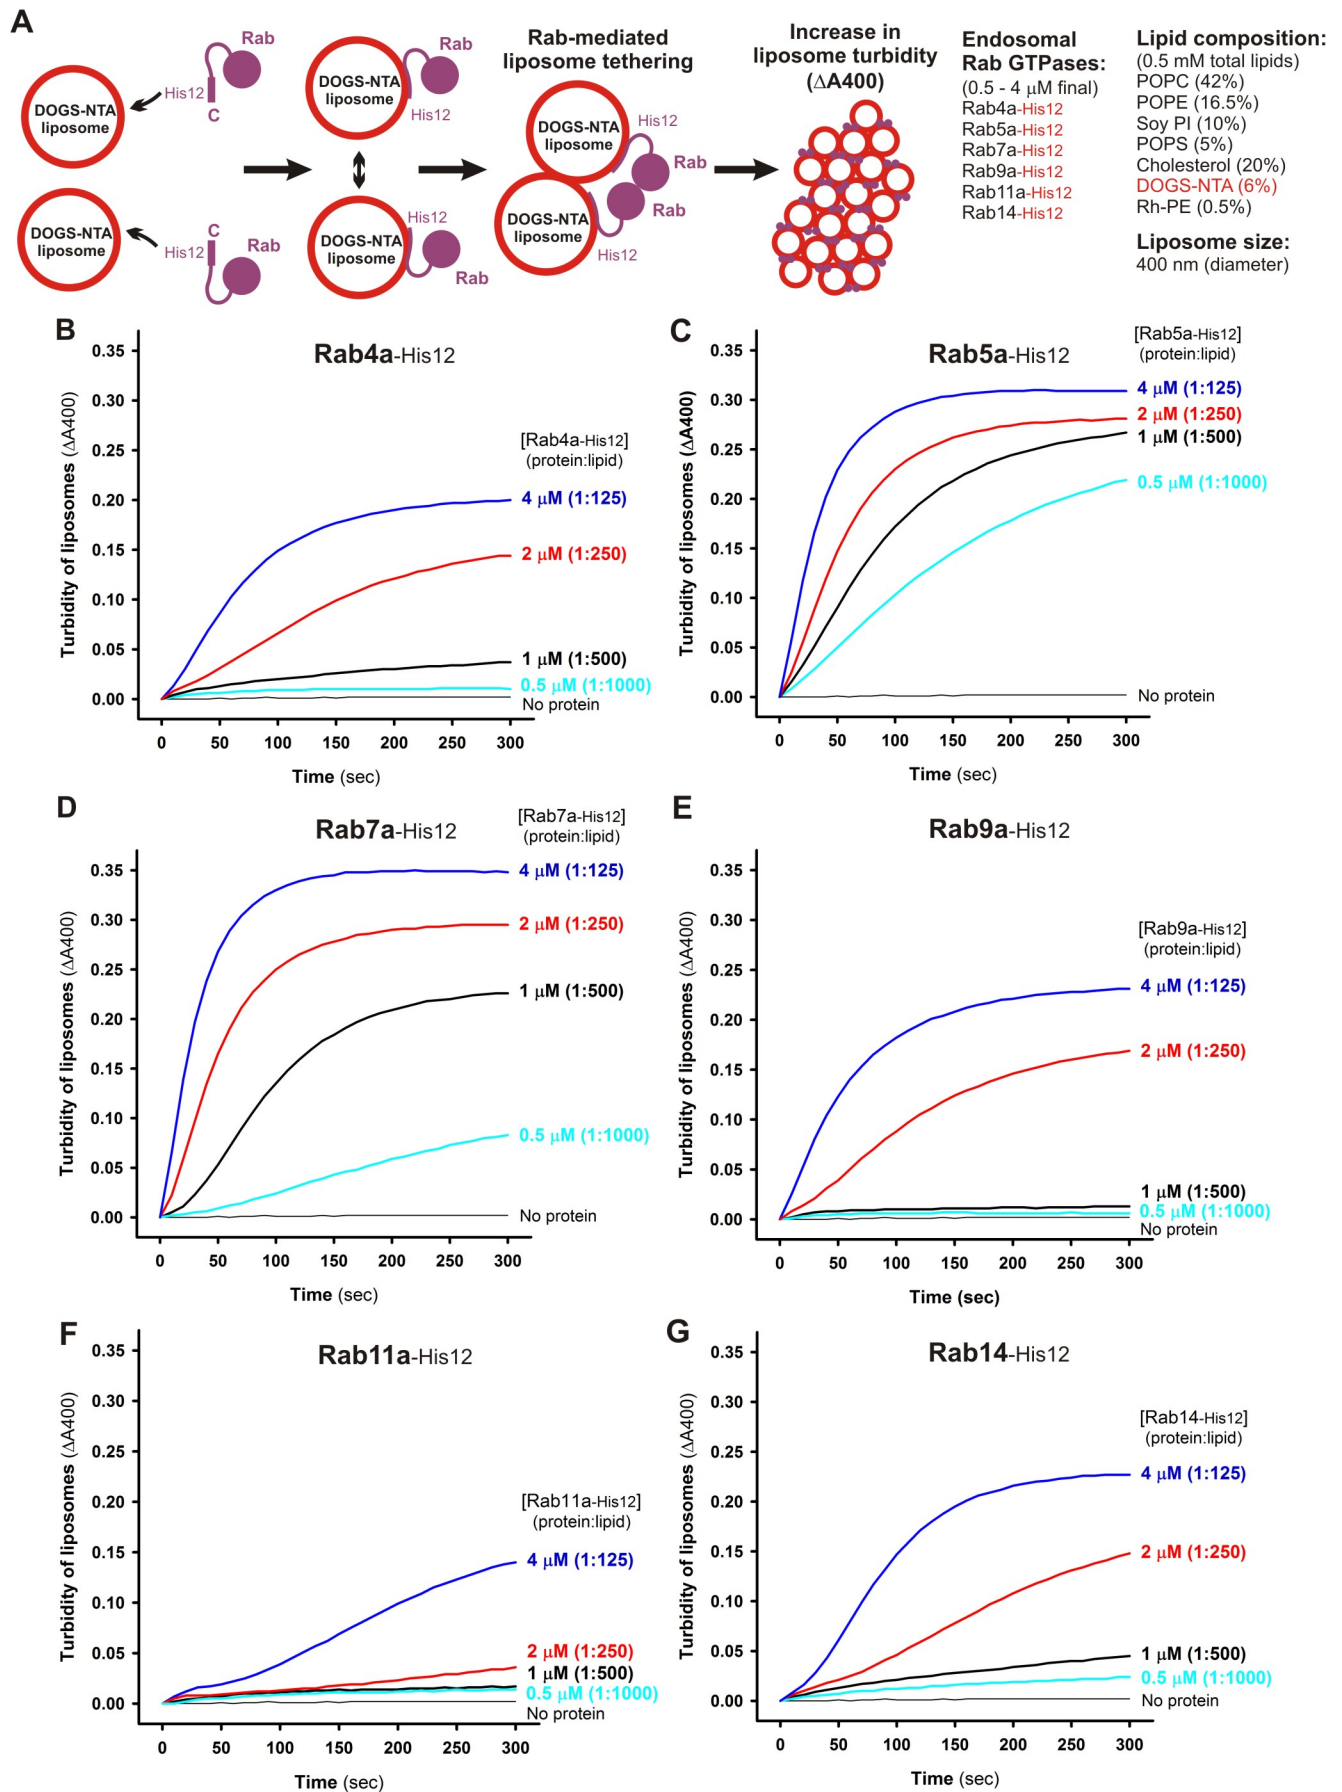

**Figure 2 .Endosomal Rab GTPases directly initiate membrane tethering by themselves in a chemically defined reconstitution system.**

(A) Schematic representation of liposome turbidity assays for testing Rab-mediated liposome tethering in B-G. (B-G) Endosomal Rab-His12 proteins (0.5 - 4  $\mu$ M each), Rab4a-His12 (B), Rab5a-His12 (C), Rab7a-His12 (D), Rab9a-His12 (E), Rab11a-His12 (F), and Rab14-His12 (G), were incubated with synthetic liposomes bearing physiological mimic lipid composition (400 nm diameter; 0.5 mM lipids) in RB150 containing MgCl<sub>2</sub> (5 mM) and DTT (1 mM) at room temperature for 300 sec. During incubation, turbidity changes of the Rab-liposome mixed reactions were monitored by measuring the absorbance at 400 nm. The protein-to-lipid molar ratios used for these turbidity reactions were from 1:1000 to 1:125, as indicated.

**Figure 3.** Inoshita & Mima

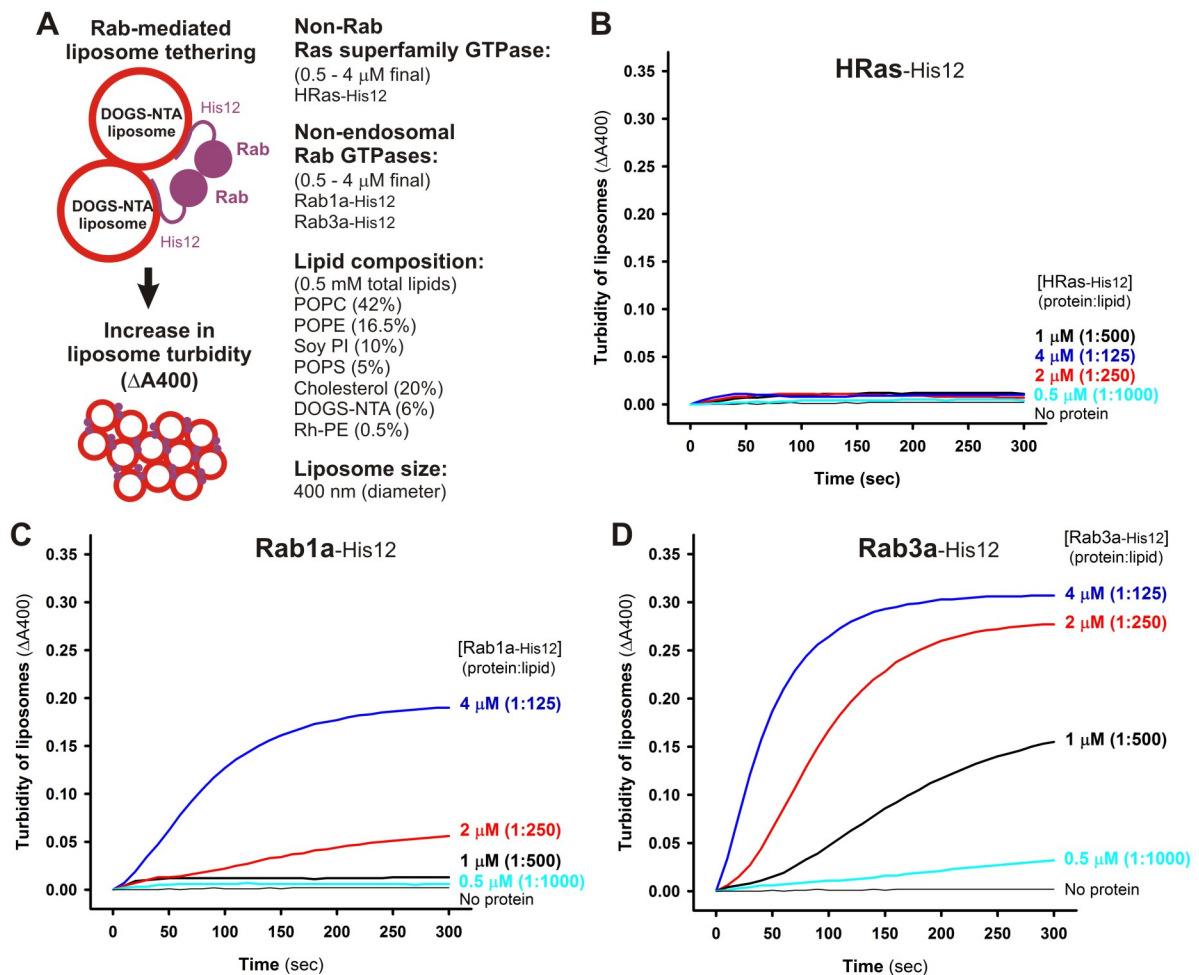

**Figure 3. Non-endosomal Rab GTPases have the inherent potency to specifically mediate membrane tethering.**

(A) Schematic representation of liposome turbidity assays for the non-Rab Ras superfamily GTPase, HRas, and non-endosomal Rab GTPases, Rab1a in ER-Golgi traffic and Rab3a in exocytosis, in B-D.

(B-D) Liposome turbidity assays were employed as in Figure 2B-G, with HRas-His12 (B), Rab1a-His12 (C), and Rab3a-His12 (D) proteins (0.5 - 4  $\mu$ M each in final) and physiological mimic synthetic liposomes (0.5 mM total lipids in final). The protein-to-lipid molar ratios used were indicated.

**Figure 4.** Inoshita & Mima

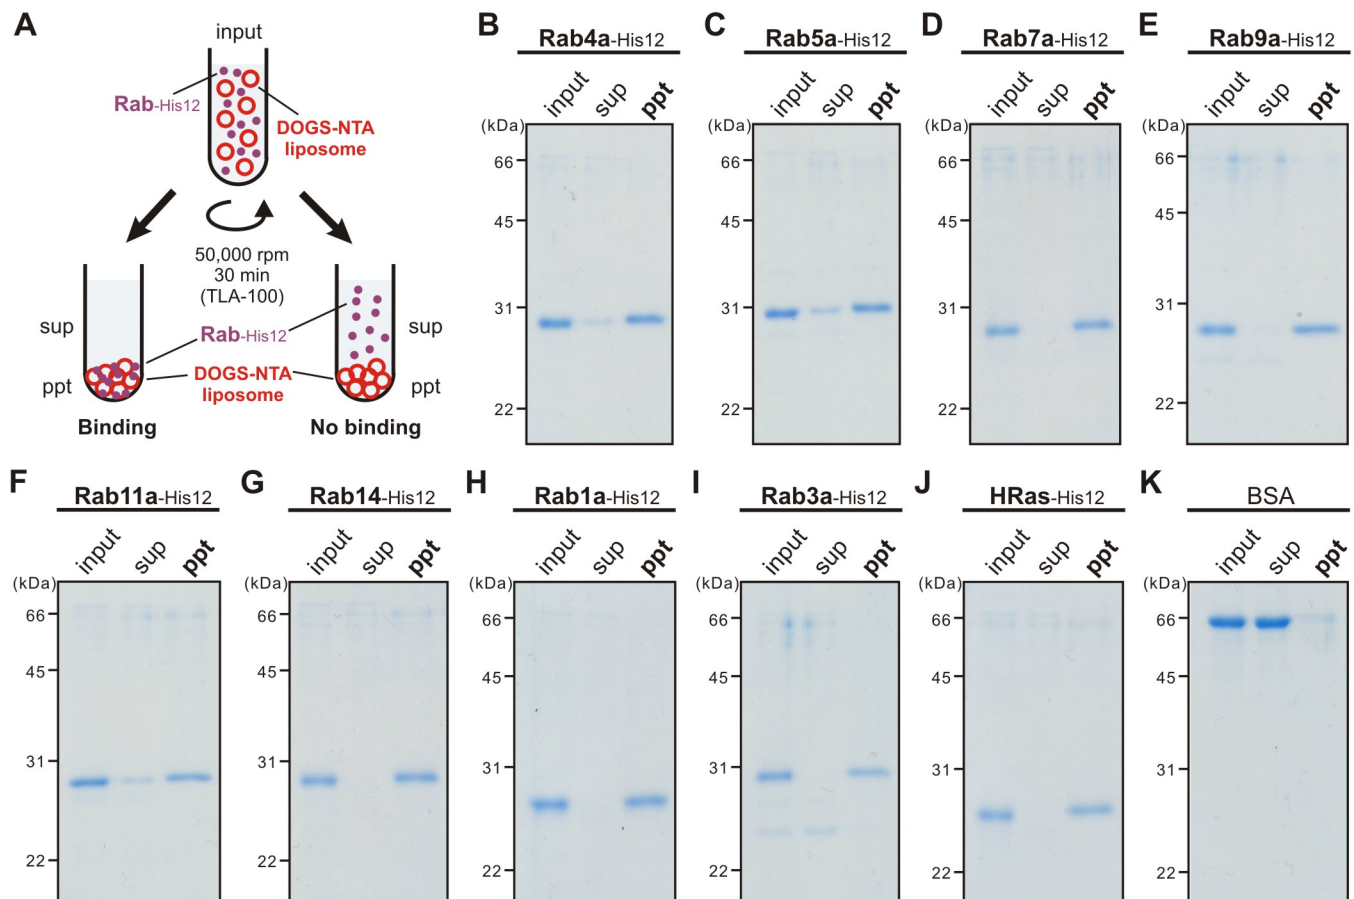

**Figure 4. Membrane association of Rab-His12 proteins onto DOGS-NTA-bearing liposomes.**

(A) Schematic representation of liposome co-sedimentation assays for testing membrane attachment of Rab-His12 proteins used in Figures 2-3.

(B-K) Rh-labeled liposomes (400 nm diameter; 1 mM total lipids in final) were incubated (30°C, 30 min) with Rab4a-His12 (B), Rab5a-His12 (C), Rab7a-His12 (D), Rab9a-His12(E), Rab11a-His12 (F), Rab14-His12 (G), Rab1a-His12 (H), Rab3a-His12 (I), HRas-His12 (J), and BSA for a negative control (K) (2  $\mu$ M final for each), and ultracentrifuged (50,000 rpm, 30 min, 4°C). The supernatants (sup) and precipitates (ppt) obtained were analyzed by SDS-PAGE and Coomassie Blue staining.



**Figure 5.** Inoshita & Mima

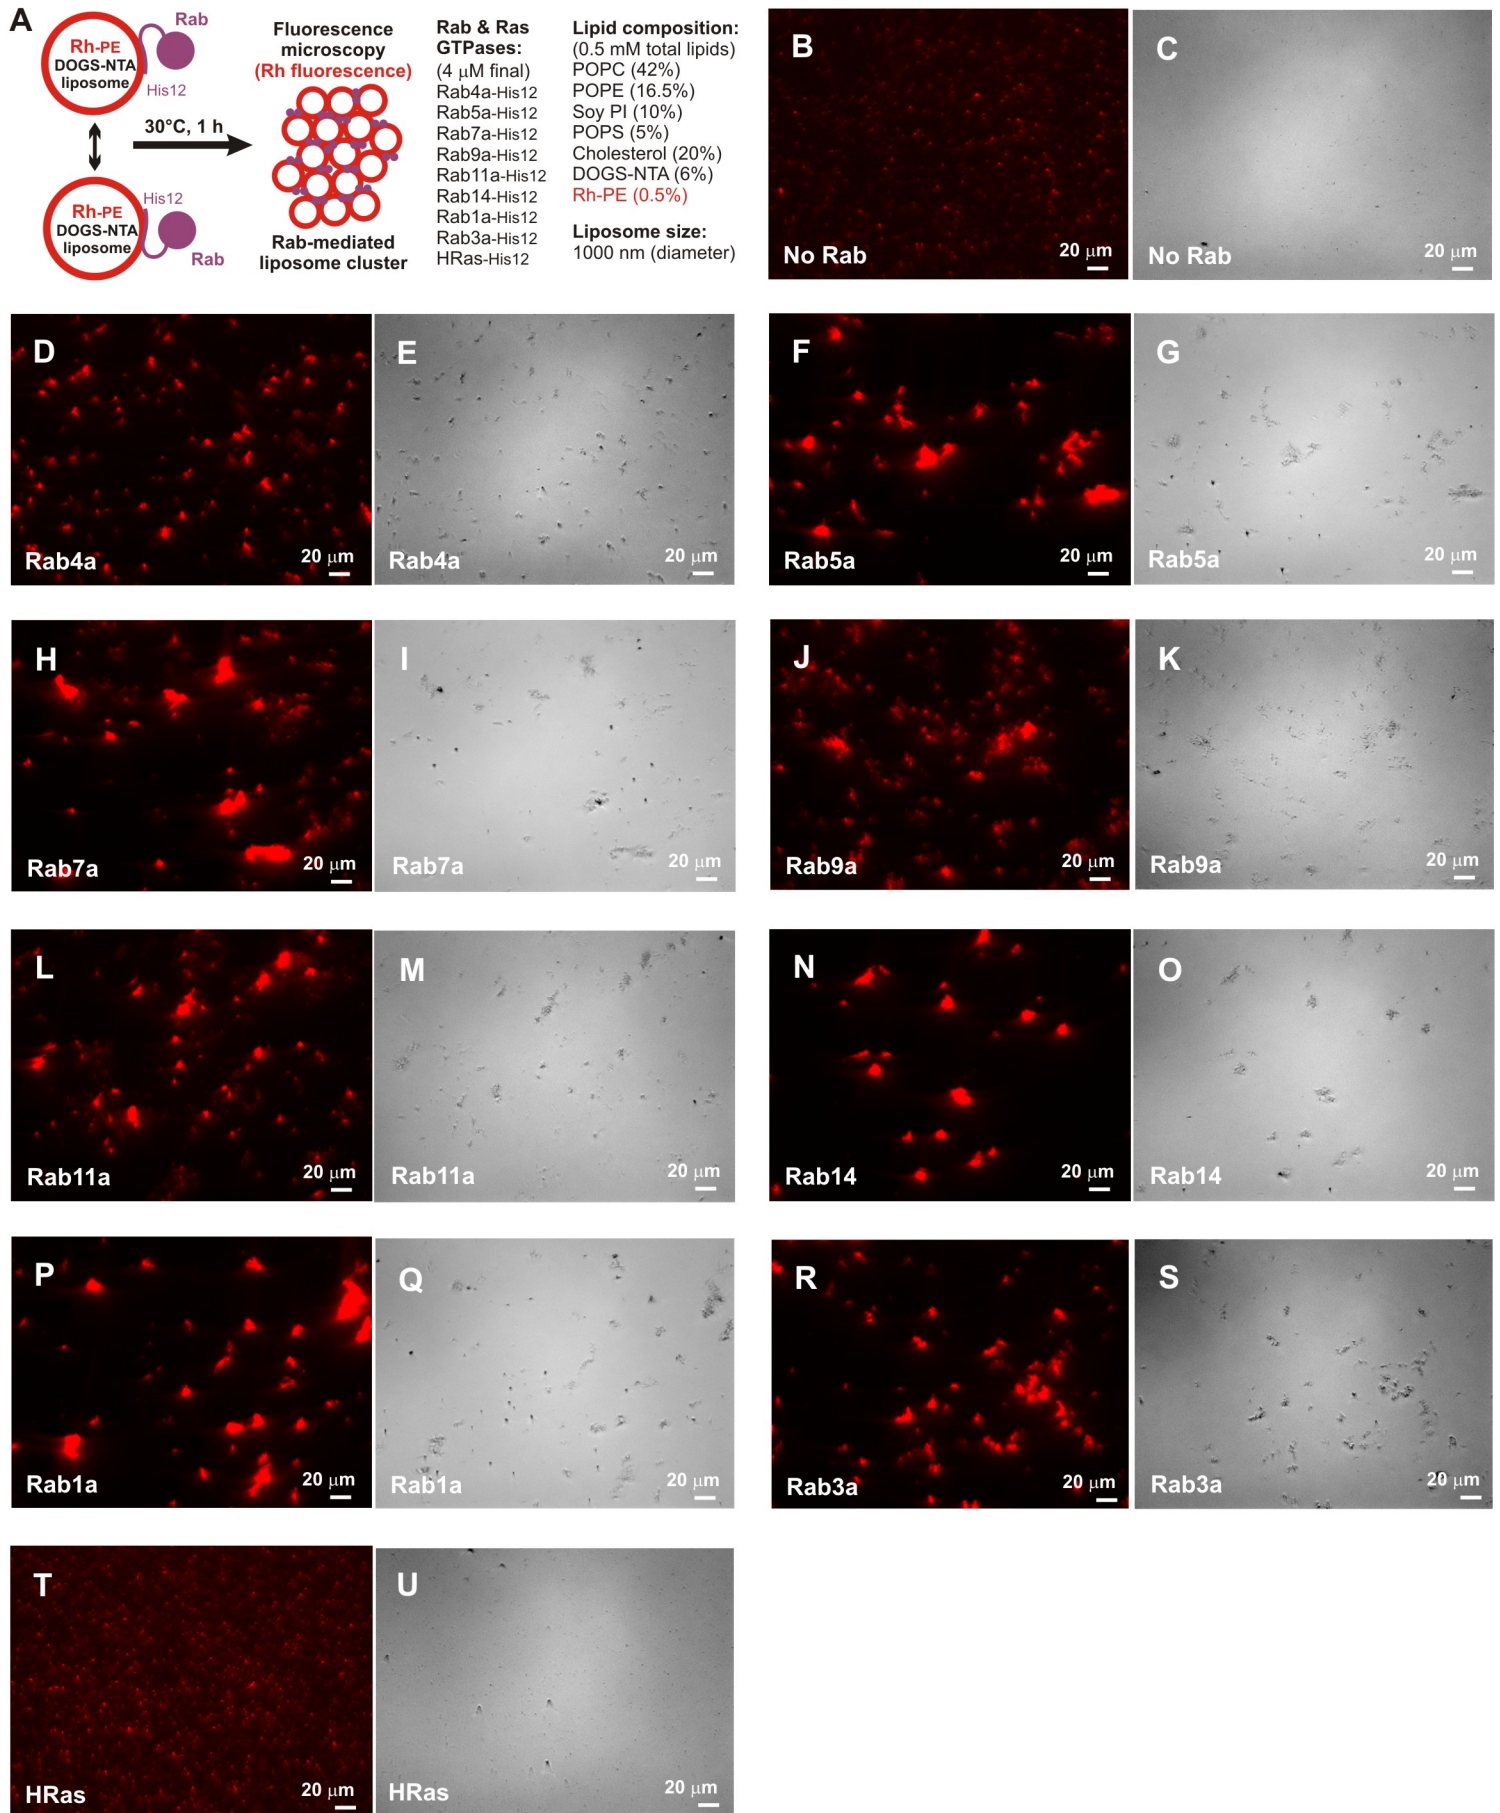

**Figure 5. Rab-mediated membrane tethering induces the formation of massive liposome clusters.**

(A) Schematic representation of fluorescence microscopic observations of Rab-mediated liposome clusters.

(B-U) Fluorescence images (B, D, F, H, J, L, N, P, R, T) and bright field images (C, E, G, I, K, M, O, Q, S, U) of Rab-mediated liposome clusters. Fluorescently-labeled liposomes bearing Rh-PE (1000 nm diameter; 0.5 mM lipids in final) were incubated at 30°C for 1 h, in the absence (B, C) and presence of the Rab- and Ras-family GTPases (4  $\mu$ M each in final), including Rab4a-His12 (D, E), Rab5a-His12 (F, G), Rab7a-His12 (H, I), Rab9a-His12 (J, K), Rab11a-His12 (L, M), Rab14-His12 (N, O), Rab1a-His12 (P, Q), Rab3a-His12 (R, S), and HRas-His12 (T, U), and subjected to fluorescence microscopy. Scale bars: 20  $\mu$ m.

**Figure 6.** Inoshita & Mima

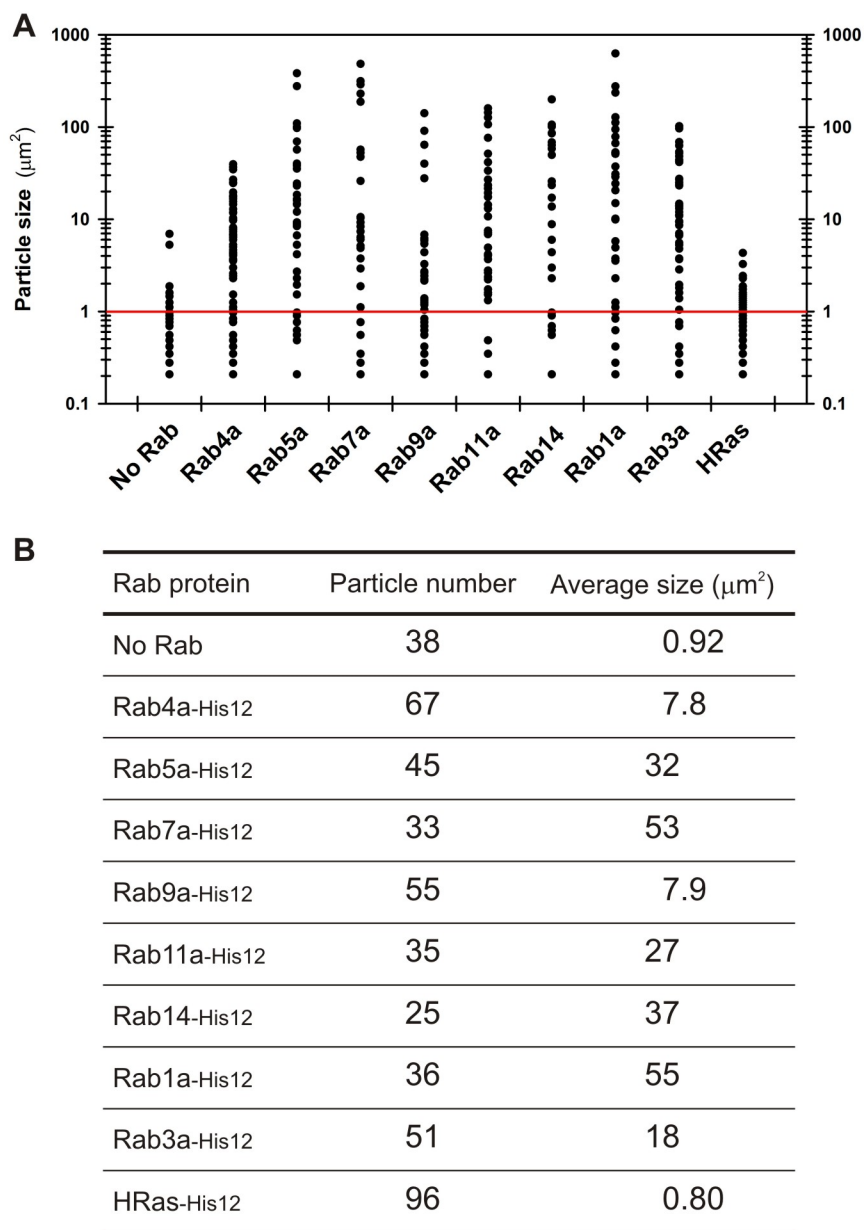

**Figure 6. Particle size distributions of liposome clusters induced by Rab-mediated membrane tethering.**

(A) Particle sizes of the Rab-mediated liposome clusters observed in the fluorescence images of Figure 5.

(B) Particle numbers and average sizes of the Rab-mediated liposome clusters observed in the fluorescence images of Figure 5.

**Figure 7.** Inoshita & Mima

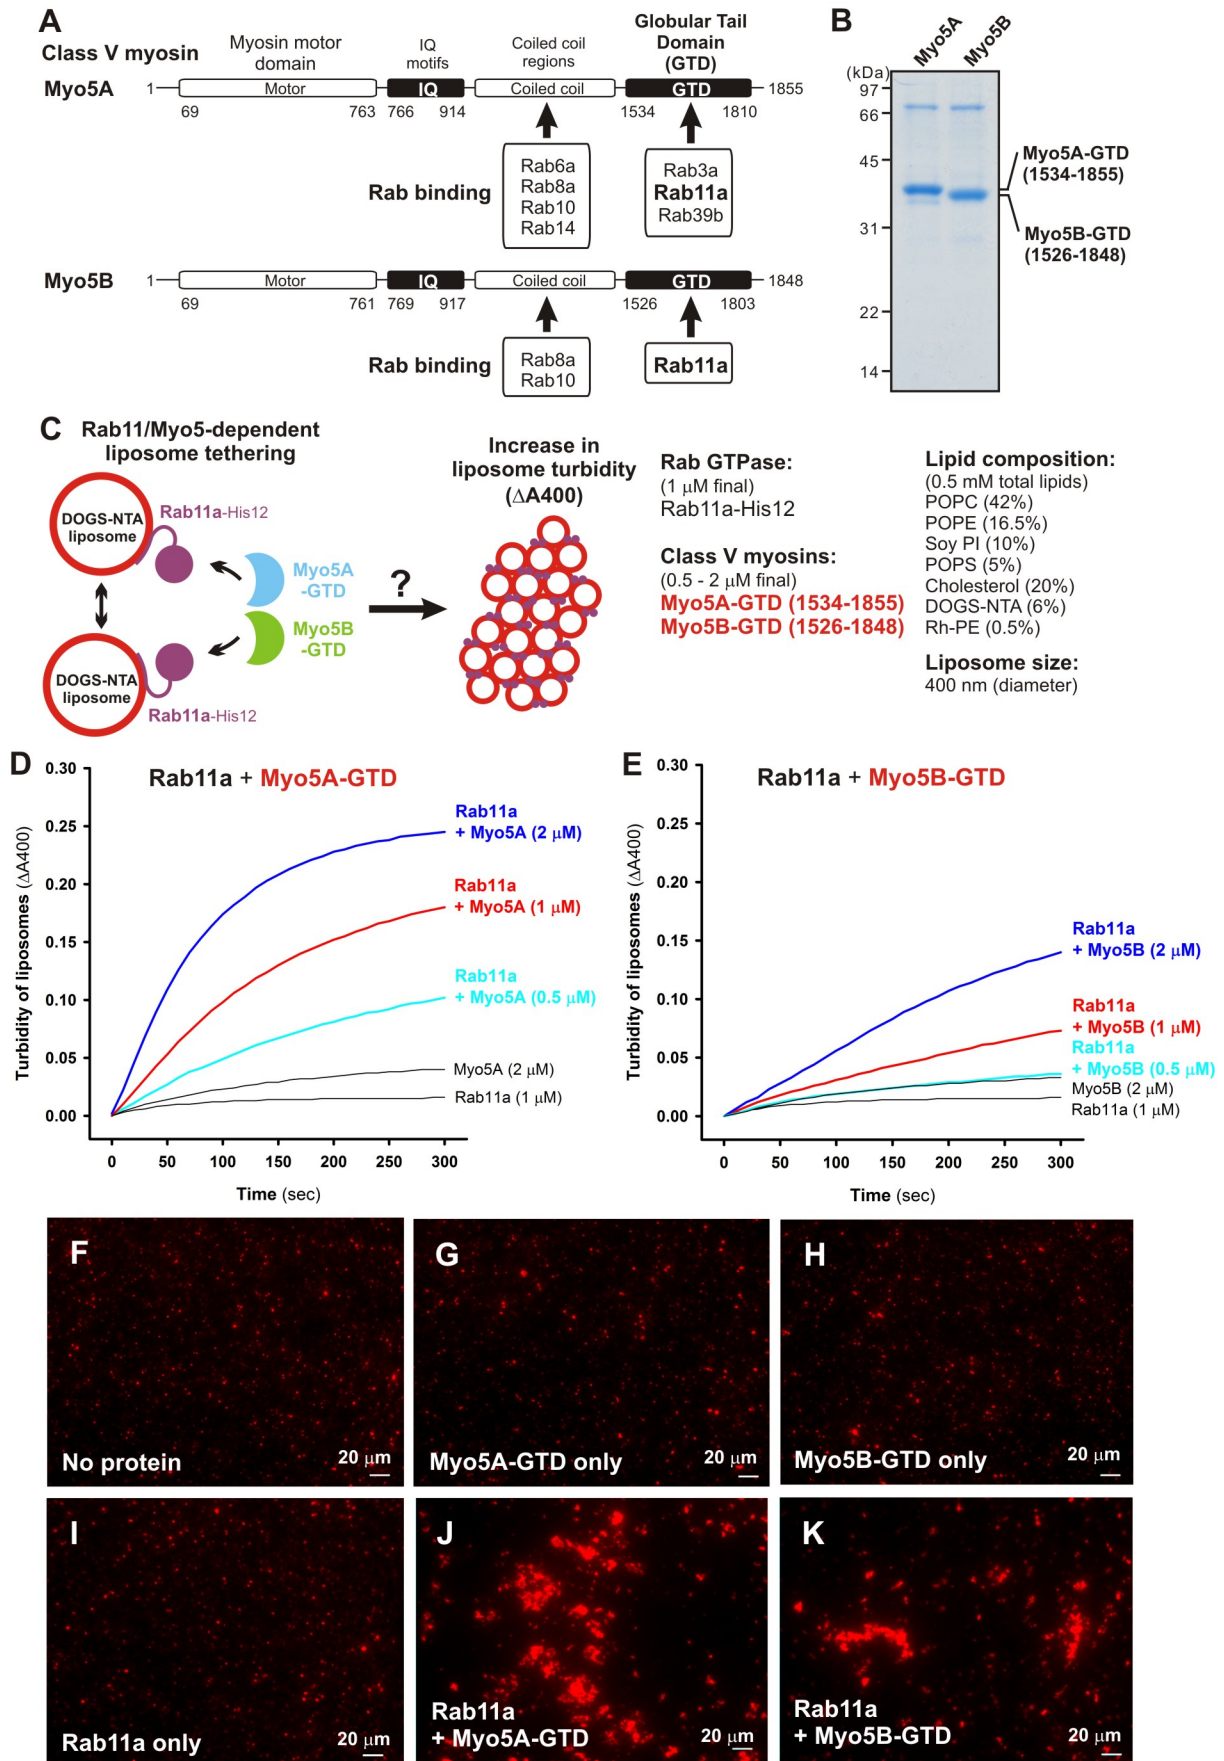

**Figure 7. Class V myosin globular tail domains, Myo5A-GTD and Myo5B-GTD, strongly stimulate Rab11a-dependent membrane tethering.**

(A) Schematic representation of class V myosins in human, Myo5A and Myo5B, showing their amino acid residues and domains including myosin motor domains, IQ motifs, coiled coil regions, and globular tail domains (GTDs). Representative Myo5-interacting Rab GTPases and the Rab-binding regions in Myo5A and Myo5B are indicated.

(B) The Coomassie Blue-stained gel of purified Myo5A-GTD and Myo5B-GTD proteins, which are comprised of the amino acid residues 1534-1855 and 1526-1848, respectively.

(C) Schematic representation of liposome turbidity assays for testing Rab11a- and Myo5-GTD-dependent liposome tethering in D, E.

(D,E) Liposome turbidity assays were employed with Rab11a-His12 (1  $\mu$ M final) as in Figure 2F, but in the presence of Myo5A-GTD (D) and Myo5B-GTD (E) (0.5 - 2  $\mu$ M final).

(F-K) Fluorescence images of Rab11a-mediated liposome clusters in the presence of Myo5-GTDs.

Rab11a-His12 (3  $\mu$ M final) and Myo5A-GTD or Myo5B-GTD (3  $\mu$ M final) were preincubated at 30°C for 30 min, mixed with Rh-labeled liposomes (1000 nm diameter; 0.8 mM lipids in final), further incubated (30°C, 30 min), and subjected to fluorescence microscopy (J, K). For a control, Rab11a-His12, Myo5-GTD, or both were omitted from the reactions where indicated (F-I). Scale bars: 20  $\mu$ m.

**Figure 8.** Inoshita & Mima

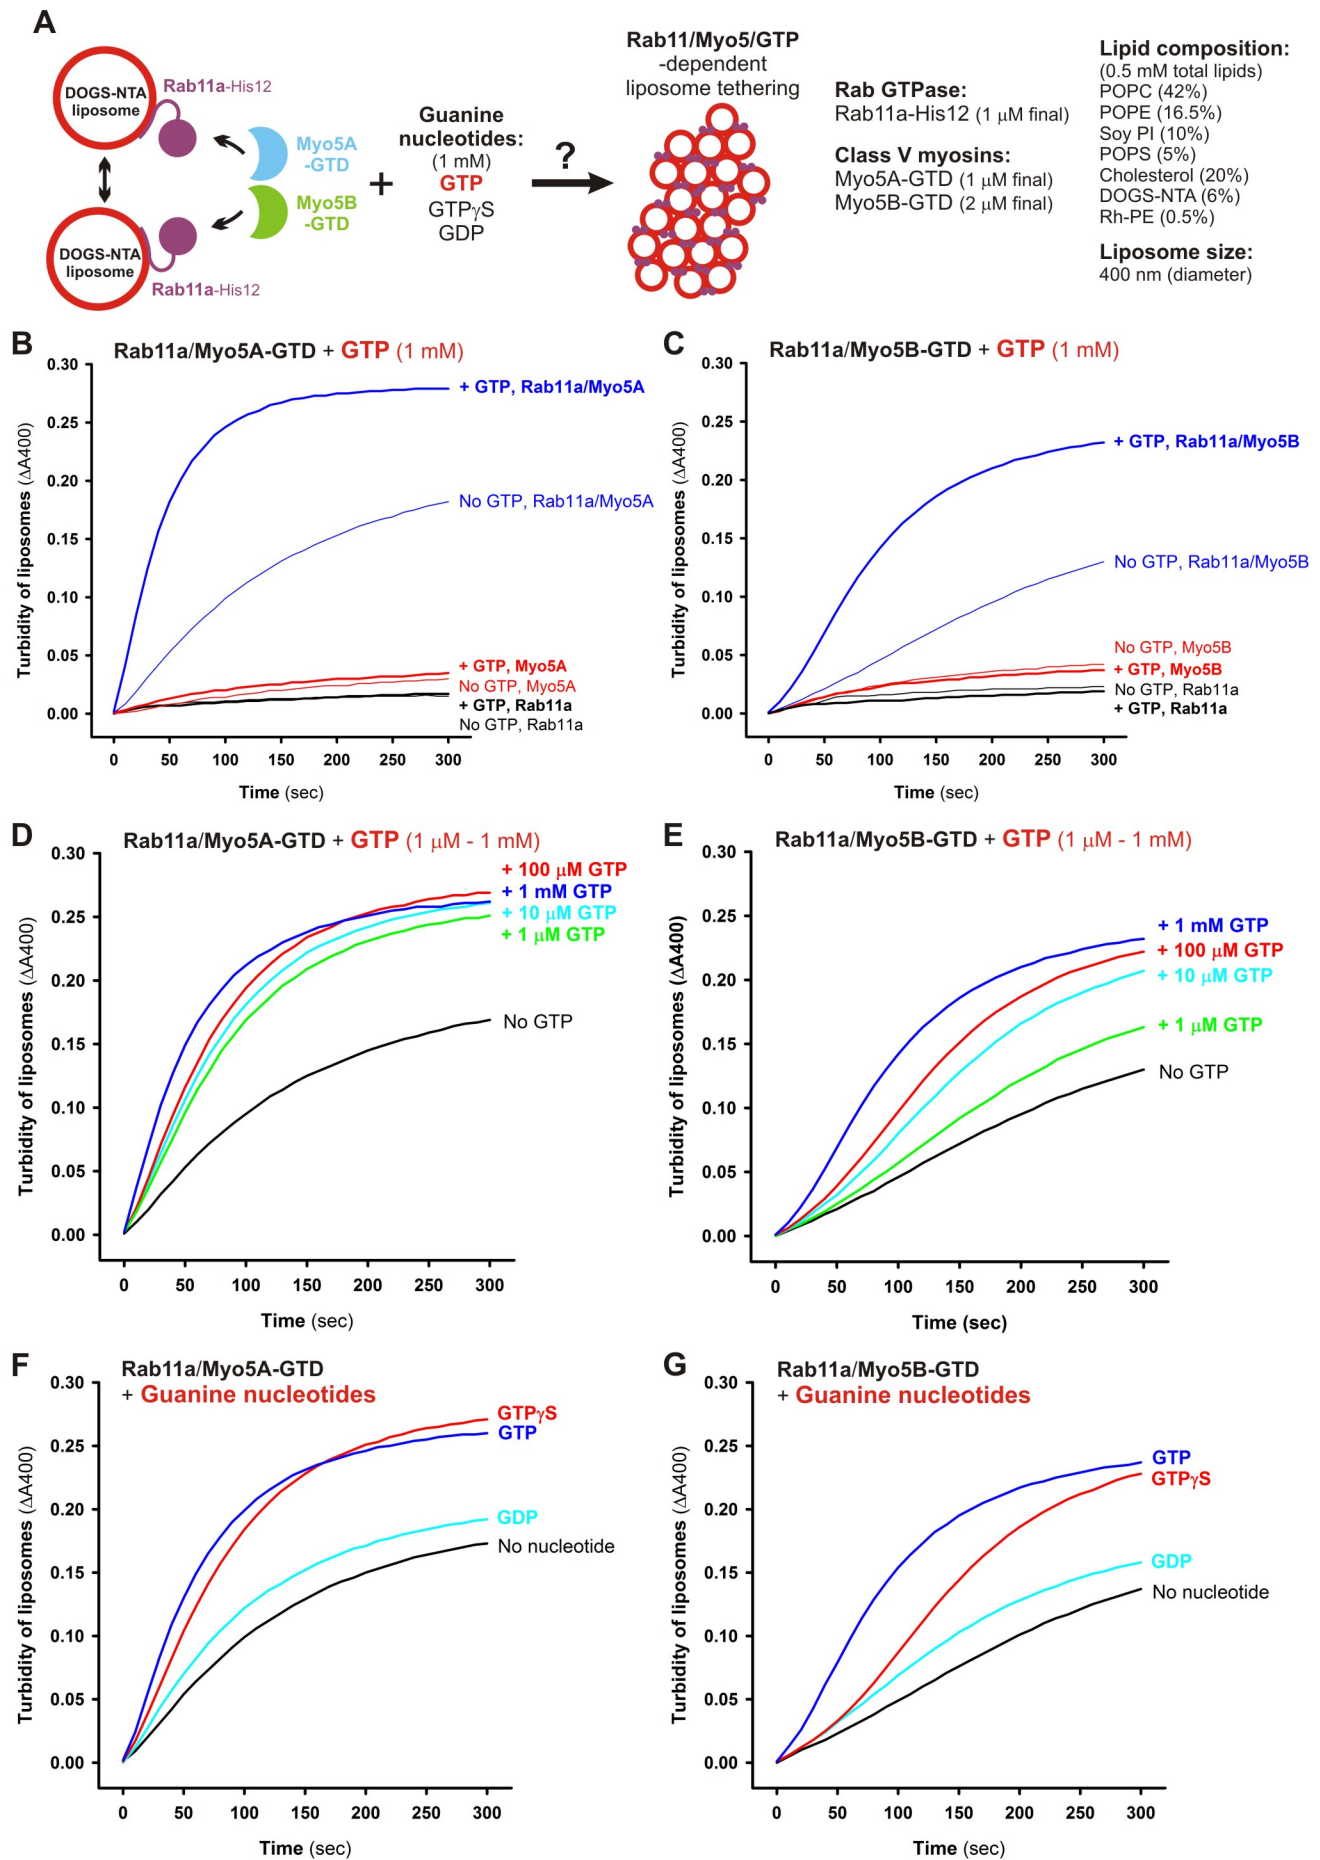

**Figure 8. Guanine nucleotide dependence of Rab11a-mediated membrane tethering in the presence of Myo5A-GTD and Myo5B-GTD.**

(A) Schematic representation of liposome turbidity assays for testing Rab11a- and Myo5-GTD-dependent liposome tethering in the presence of GTP in B-G.

(B, C) Rab11a/Myo5-dependent membrane tethering is strongly and specifically promoted by the addition of GTP. Liposome turbidity assays with Rab11a-His12 (1  $\mu$ M) and Myo5A-GTD (1  $\mu$ M) (B) or Myo5B-GTD (2  $\mu$ M) (C) were performed as in Figure 7D, E, but in the presence of GTP (1 mM).

(D, E) Liposome turbidity assays were employed with Rab11a-His12 and Myo5A-GTD (D) or Myo5B-GTD (E) as in B, C, in the presence of various concentrations of GTP (1  $\mu$ M - 1 mM).

(F, G) Liposome turbidity assays were employed with Rab11a-His12 and Myo5A-GTD (F) or Myo5B-GTD (G) as in B, C, in the presence of GTP, GTP $\gamma$ S, and GDP (1 mM for each).

**Figure 9.** Inoshita & Mima

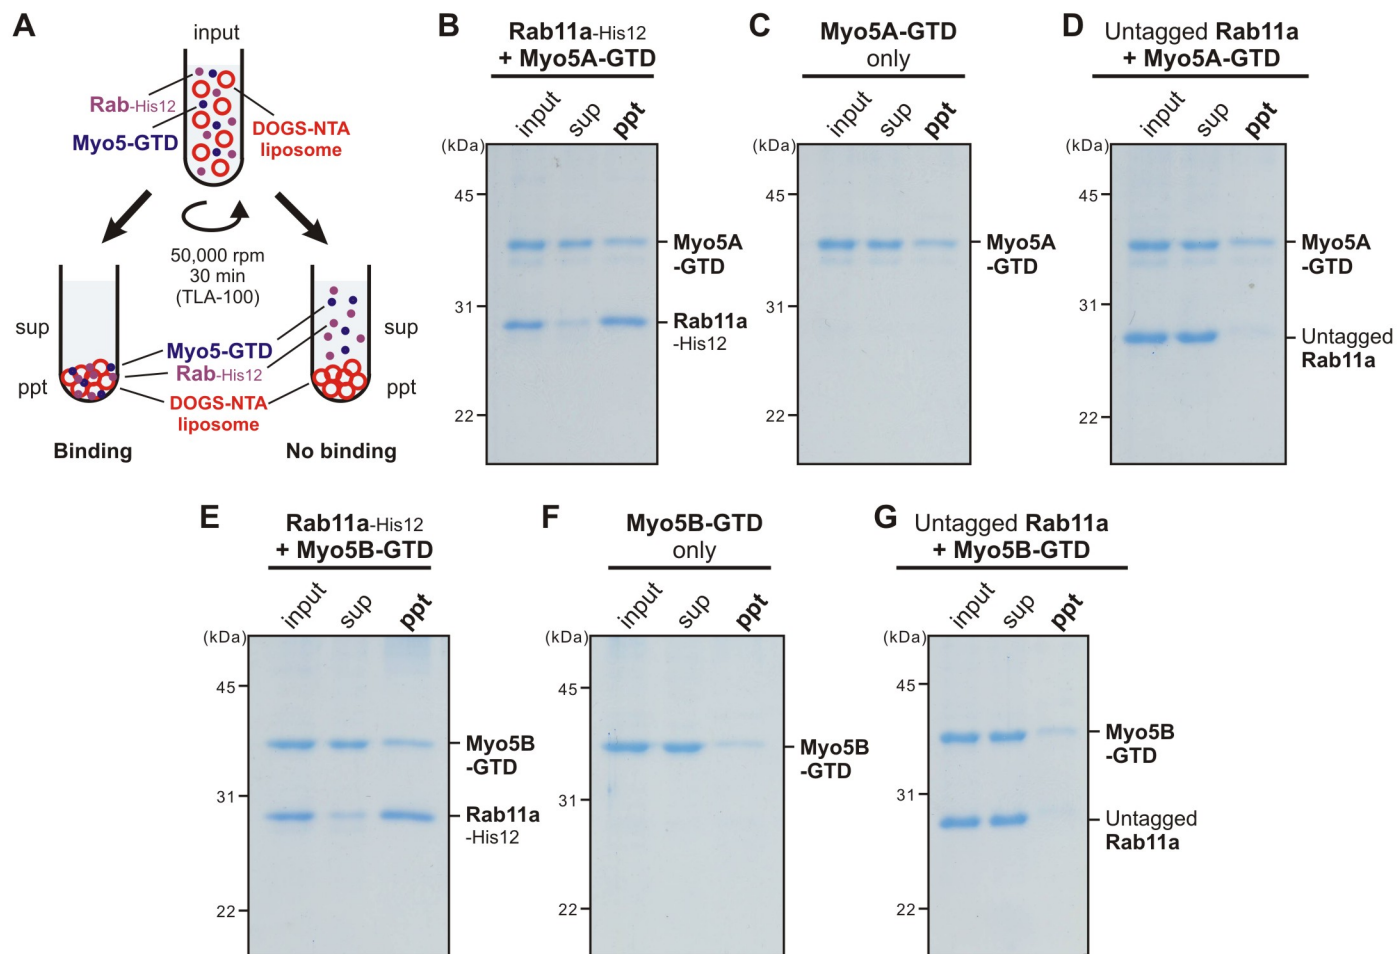

**Figure 9. Membrane association of Myo5-GTD proteins onto Rab11a-anchored liposomes.**

(A) Schematic representation of liposome co-sedimentation assays for testing membrane binding of Myo5A-GTD and Myo5B-GTD to Rab11a-bound liposomes.

(B-G) Liposome co-sedimentation assays were employed as in Figure 4, with Rh-labeled liposomes (400 nm diameter; 1 mM lipids) and Rab11a-His12 (2  $\mu$ M) (B, E), but in the presence of Myo5A-GTD (2  $\mu$ M) (B-D), Myo5B-GTD (2  $\mu$ M) (E-G), and GTP (1 mM). For a control, the reactions without Rab11a-His12 (C, F) or with the untagged form of Rab11a lacking a His12 tag (untagged Rab11a) (D, G) were also tested. The supernatants (sup) and precipitates (ppt) obtained were analyzed by SDS-PAGE and Coomassie Blue staining.



**Figure 10.** Inoshita & Mima

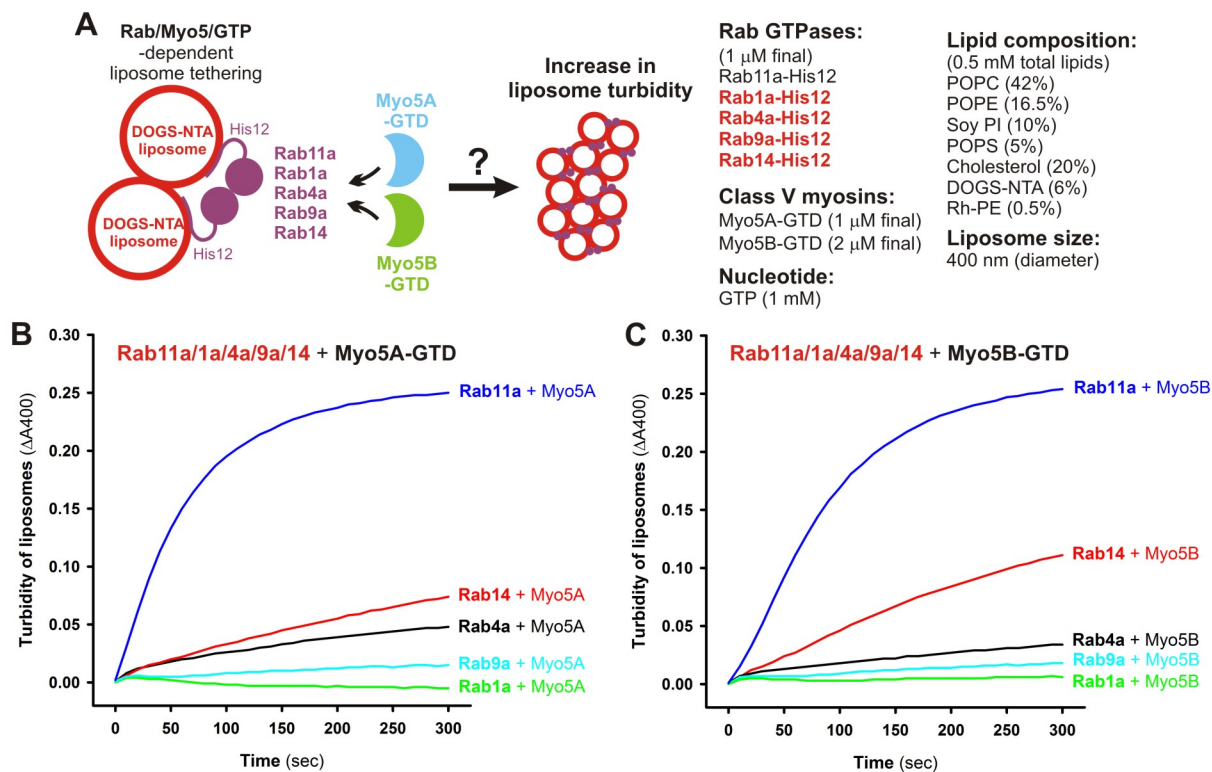

**Figure 10. Myo5A-GTD and Myo5B-GTD selectively activate Rab11a-dependent membrane tethering.**

(A) Schematic representation of liposome turbidity assays in B, C, for the various Rab GTPases (Rab11a, Rab1a, Rab4a, Rab9a, Rab14) in the presence of Myo5-GTDs and GTP.

(B, C) Myo5-GTDs specifically promote efficient membrane tethering mediated by the cognate Rab GTPase, Rab11a. Liposome turbidity assays were employed with Myo5A-GTD (B) or Myo5B-GTD (C) and GTP, as in Figure 8B, C, but for Rab11a, Rab1a, Rab4a, Rab9a, and Rab14 GTPases.
